# Supplementary material for: Oxygen delivery, carbon dioxide removal, energy transfer to lungs and pulmonary hypertension behavior during venous-venous extracorporeal membrane oxygenation support: a mathematical modeling approach
Source: PubMed Central journal article supplement (PMC6649222; doi:10.5935/0103-507x.20190018), 2019
Supplement: rbti-31-02-0113-suppl1.pdf [file rbti-31-02-0113-suppl1.pdf]

**Oxygen delivery, carbon dioxide removal, energy transfer to lungs and pulmonary hypertension behavior during venous-venous extracorporeal membrane oxygenation support: a mathematical modeling approach**

*Oferta de oxigênio, remoção de dióxido de carbono, transferência de energia aos pulmões e comportamento da hipertensão pulmonar durante o suporte com oxigenação por membrana extracorpórea: um modelo matemático*

Bruno Adler Maccagnan Pinheiro Besen<sup>1,2</sup>, Thiago Gomes Romano<sup>3,4</sup>, Rogerio Zigaib<sup>1,5</sup>, Pedro Vitale Mendes<sup>1,3</sup>, Livia Maria Garcia Melro<sup>1,6</sup>, Marcelo Park<sup>1</sup>

## INDEX

|                                                                                                                        |    |
|------------------------------------------------------------------------------------------------------------------------|----|
| <b>1. METHODS</b> .....                                                                                                | 3  |
| 1.1. Energy transfer from ventilator to the lungs.....                                                                 | 3  |
| 1.2. Arterial oxygenation and total amount of oxygen transfer .....                                                    | 6  |
| 1.2.1. Standard formulas used.....                                                                                     | 8  |
| 1.2.2. Creating mathematical terms of the oxygen modeling .....                                                        | 8  |
| 1.2.3. Looping and interactions to reach the equilibrium.....                                                          | 15 |
| 1.3. Arterial carbon dioxide and total amount of carbon dioxide transfer                                               | 23 |
| 1.3.1. Standard formulas used.....                                                                                     | 23 |
| 1.3.2. Creating mathematical terms of the carbon dioxide modeling .....                                                | 23 |
| 1.3.3. Looping and interactions to reach the equilibrium.....                                                          | 27 |
| 1.4. Oxygen partial pressure responsible for pulmonary vasoconstriction inhibition ( $P_{\text{stimulusO}_2}$ ). ..... | 36 |
| <b>2. RESULTS</b> .....                                                                                                | 36 |
| 2.1. Energy transfer from ventilator to the lungs.....                                                                 | 36 |
| 2.2. Arterial oxygenation and total amount of oxygen transfer .....                                                    | 42 |
| 2.3. Arterial carbon dioxide and total amount of carbon dioxide transfer                                               | 44 |
| 2.4. Oxygen partial pressure responsible for pulmonary vasoconstriction inhibition ( $P_{\text{stimulusO}_2}$ ). ..... | 45 |
| <b>3. REFERENCES</b> .....                                                                                             | 46 |
| <b>4. APENDIX</b> .....                                                                                                | 48 |
| 4.1. Script for SatO <sub>2</sub> looping.....                                                                         | 48 |
| 4.2. Script for P <sub>a</sub> CO <sub>2</sub> looping .....                                                           | 49 |

## **1. METHODS**

In this supplementary material, we describe the principles of the mathematical modeling.

### **1.1. Energy transfer from the ventilator to the lungs**

The basic principle of mechanical ventilation relies on active pulmonary inflation through the energy transfer from the mechanical ventilator to the lungs. In acute respiratory distress syndrome (ARDS) patients, the higher the pulmonary compliance and the lower the airway resistance, the lower will be ventilator-to-lungs energy transfer, and a high proportion of this low amount of energy transfer will be dissipated generating tidal volume ( $V_t$ ) (Figure 1S). Likewise, low pulmonary compliance with low airway resistance will be associated with a high amount of the ventilator-lungs energy transfer dissipated in alveoli overdistension and cyclic opening of respiratory units, a process determinant of the physical concept of lungs strain, in which the higher the strain, the more the lungs expand relatively to initial expiratory lung volumes.<sup>(1,2)</sup> The strain is partitioned in static strain, as generated by positive end-expiratory pressure (PEEP), and dynamic strain, as generated by  $V_t$ . The dynamic strain results in deformation of the lung structure, triggers inflammation, edema and hemorrhage formation. Furthermore, a high static strain is associated with slight inter-alveolus septum rupture and interstitial emphysema development.<sup>(2,3)</sup>

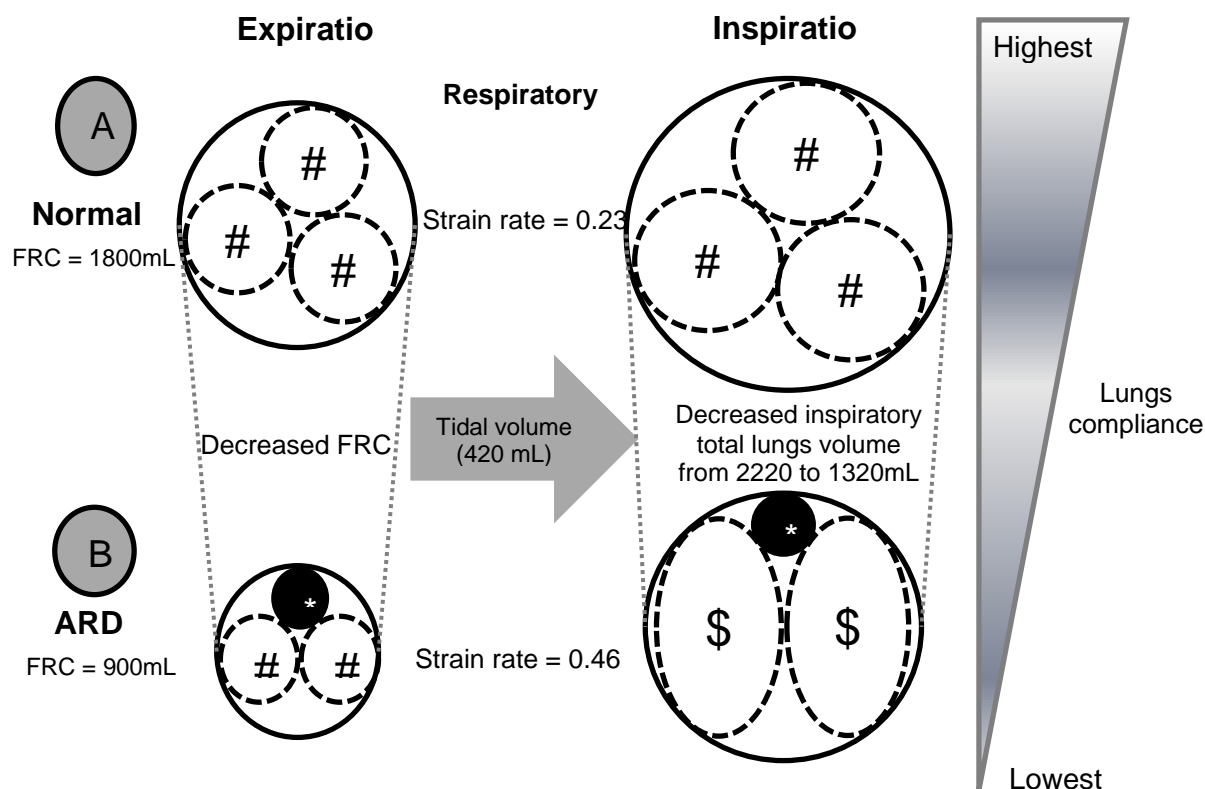

**Figure 1S** - Exploring the strain concept. Defining strain rate as tidal volume/ functional residual capacity ratio, in **Panel A**) (Normal lungs condition), the higher functional residual capacity promotes a lower strain rate than **Panel B**) (acute respiratory distress syndrome condition), considering the tidal volume is the same. In acute respiratory distress syndrome, the collapsed alveolus causes a lower pulmonary compliance than in normal condition; therefore the energy spent generating tidal volume in normal condition is also spent in mechanical alveoli hyperdistention (higher strain rate) as presented in acute respiratory distress syndrome condition. FRC – functional residual capacity; ARDS - acute respiratory distress syndrome. # Normally aerated alveoli; \* collapsed alveoli; \$ hyperdistended alveoli.

In order to quantify the amount of energy transferred from the ventilator to the lung, the mechanical power concept was used.<sup>(4)</sup> The mechanical power is derived from the equation of motion, and then computes the most important energy load components (Elastic and resistive, adding PEEP to the equation and neglecting inertial forces) of each respiratory cycle.<sup>(5)</sup> To quantify the total energy load transference per minute, the obtained value is multiplied by the respiratory rate. The calculation of energy load transferred from the mechanical ventilator to the lungs per minute is mathematically expressed as following:<sup>(4)</sup>

$$\text{Power}_{rs} = 0.098 * \text{RR} * \{ \Delta V^2 * [ \frac{1}{2} * \text{EL}_{rs} + \text{RR} * [(1 + \text{I:E}) / (60 * \text{I:E}) ] * \text{R}_{aw} ] + \Delta V * \text{PEEP} \}$$

Where:

$\text{Power}_{rs}$  - energy transferred to the lungs (Joules/minute)

RR - respiratory rate (Breaths/minute)

$\Delta V$  - tidal volume (mL)

$\text{EL}_{rs}$  - respiratory system elastance (cmH<sub>2</sub>O/L)

I:E - inspiratory time / expiratory time ratio

$\text{R}_{aw}$  - airway resistance (cmH<sub>2</sub>O/L/second)

PEEP - positive end-expiratory pressure (cmH<sub>2</sub>O)

The calculation of the mechanical power has a good correlation and a reasonable agreement with the tomographic measurement of the pulmonary energy load in mechanically ventilated patients.<sup>(4)</sup>

Some ventilatory settings are used during ultraprotective ventilation beside extracorporeal membrane oxygenation (ECMO) support, with different impact on mechanical power. Since pressure controlled modality (PCV) is frequently used in ECMO supported patients, the energy load related variables adjusted at bedside are: respiratory rate (RR), PEEP, I:E, and driving pressure. Ventilatory settings allowing lung rest are used in up to 66% of Extracorporeal Life-Support organization (ELSO) registered ECMO centers.<sup>(6)</sup> In this matter, the CESAR trial ventilatory strategy is a very attractive one.<sup>(7)</sup> Furthermore, this ventilatory strategy is widely used,<sup>(6,8,9)</sup> and also by our group.<sup>(10)</sup> This strategy includes the following ventilatory settings: PEEP = 10 - 15cmH<sub>2</sub>O, RR = 10 - 15BPM, and a driving pressure of 5 - 15cmH<sub>2</sub>O. There is an

association of higher PEEPs (10 - 15cmH<sub>2</sub>O) and lower plateau or driving pressures with lower mortality.<sup>(8,11)</sup> The impact of I:E ratio on any outcome is not well established. Therefore, the marginal effect of each cited variable on the mechanical power was simulated in the supplementary results. As many ventilators offer the possibility of direct inspiratory time adjustment, the plot between inspiratory time normalized to a RR = 10BPM and mechanical power was also built.

In order to facilitate the understanding of PEEP interaction effect with driving pressure on the mechanical power, and RR interaction effect with driving pressure on the mechanical power, two graphs plotting driving pressure and mechanical power were built, one with different PEEP levels and other with different RRs.

The airway pressure release ventilation (APRV) is used in up to 11% of ELSO centers.<sup>(6)</sup> Our group has used the APRV in patients with alveolar hemorrhage or in patients with collapsed lung who is potentially recruitable. The APRV is also explored in the supplementary results section.

## **1.2. Arterial oxygenation and total amount of oxygen transfer**

We did the mathematical modeling considering the venous-venous configuration with the drainage cannula introduced in the femoral vein, and the arterial cannula introduced in the jugular vein. The oxygenation, oxygen transfer, decarboxylation, and carbon dioxide transfer modeling were explored using the following model:

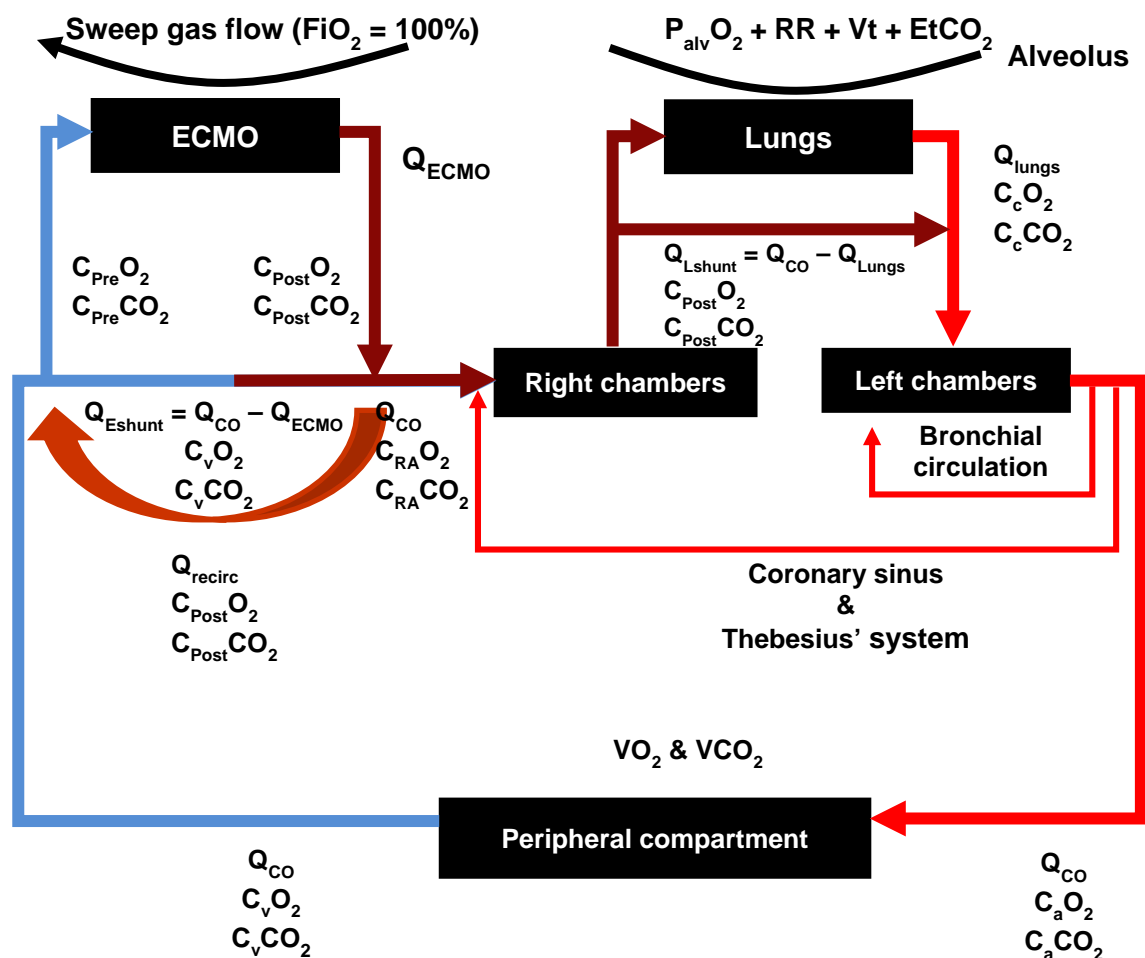

**Figure 2S** - Patient and extracorporeal membrane oxygenation coupling scheme of the mathematical modeling. In this figure, the blood flows, oxygen and carbon dioxide blood contents used in the mathematical modeling are depicted.  $FiO_2$  - fraction of inspired oxygen;  $P_{alv}O_2$  - oxygen alveolar partial pressure; RR - respiratory rate; Vt - tidal volume; ECMO - extracorporeal membrane oxygenation;  $C_{pre}O_2$  - pre-extracorporeal membrane oxygenation oxygen blood content;  $C_{post}O_2$  - post-extracorporeal membrane oxygenation oxygen blood content;  $C_{pre}CO_2$  - pre-extracorporeal membrane oxygenation carbon dioxide blood content;  $C_{post}CO_2$  - post-extracorporeal membrane oxygenation carbon dioxide blood content;  $Q_{ECMO}$  - extracorporeal membrane oxygenation blood flow;  $Q_{Eshunt}$  - extracorporeal membrane oxygenation parallel cava blood flow (cava blood flow without extracorporeal membrane oxygenation);  $Q_{CO}$  - cardiac output;  $C_vO_2$  - venous oxygen blood content;  $C_{RA}O_2$  - right atrium oxygen content;  $C_vCO_2$  - venous carbon dioxide blood content;  $C_{RA}CO_2$  - right atrium carbon dioxide content;  $Q_{recirc}$  - extracorporeal membrane oxygenation recirculation blood flow;  $C_{post}CO_2$  - post-extracorporeal membrane oxygenation carbon dioxide blood content;  $Q_{Lungs}$  - pulmonary blood flow in matched aerated alveoli/capillaries;  $C_cO_2$  - pulmonary alveolar capillary blood oxygen content;  $C_cCO_2$  - pulmonary alveolar capillary carbon dioxide blood content;  $Q_{Lshunt}$  - pulmonary blood flow in shunt regions;  $VO_2$  - peripheral compartment oxygen consumption;  $VCO_2$  - peripheral compartment carbon dioxide production.

#### General nomenclature

$VO_2$  - peripheral compartment oxygen consumption.

$VCO_2$  - peripheral compartment carbon dioxide production.

$P_{alv}O_2$  - oxygen alveolar partial pressure.

$EtCO_2$  - end-tidal carbon dioxide partial pressure.

RR - respiratory rate

$V_t$  - tidal volume

#### Blood Flows

$Q_{CO}$  – cardiac output,  $Q_{ECMO}$  – ECMO blood flow,  $Q_{Eshunt}$  – ECMO parallel cava blood flow (cava blood flow without ECMO oxygenation),  $Q_{recirc}$  – ECMO recirculation blood flow,  $Q_{Lungs}$  – pulmonary blood flow in matched aerated alveoli / capillaries,  $Q_{Lshunt}$  – pulmonary blood flow in shunt regions.

#### Oxygen and carbon dioxide blood contents

$C_aO_2$  – arterial oxygen blood content,  $C_vO_2$  - venous oxygen blood content,  $C_{pre}O_2$  – pre-ECMO oxygen blood content,  $C_{post}O_2$  - post-ECMO oxygen blood content,  $C_{RA}O_2$  – right atrium oxygen content, and  $C_cO_2$  – pulmonary alveolar capillary blood oxygen content.

$C_aCO_2$  – arterial carbon dioxide blood content,  $C_vCO_2$  - venous carbon dioxide blood content,  $C_{pre}CO_2$  – pre-ECMO carbon dioxide blood content,  $C_{post}CO_2$  – post-ECMO carbon dioxide blood content,  $C_{RA}CO_2$  – right atrium carbon dioxide content, and  $C_cCO_2$  – pulmonary alveolar capillary carbon dioxide blood content.

### 1.2.1. Standard formulas used

- Blood local oxygen content ( $C_{LO_2}$ ) =  $PO_2 * 0.0031 + (1.34 * SatO_2 * Hb)$
- Local oxygen delivery ( $DO_{L2}$ ) =  $C_{LO_2} * Q_L$
- $VO_2 = (C_a - C_v) * Q_{CO}$
- Oxygen transfer =  $(C_{post}O_2 - C_{pre}O_2) * Q_{ECMO}$
- Pulmonary shunt ( $Q_S/Q_T$ ) =  $(C_cO_2 - C_aO_2) / (C_cO_2 - C_vO_2)$

### 1.2.2. Creating mathematical terms of the oxygen modeling

(1) Following the figure 2S, starting in the systemic venous compartment, computing the blood drained from the peripheral compartment:

From Fick's equation:



$$S_vO_2 = SaO_2/100 - (VO_2 / (Q_{CO} \times Hb \times 1.36 \times 10))$$

and

$$C_vO_2 = S_vO_2 \times 1.36 \times Hb$$

Where Hb is the hemoglobin level in g/dL and  $Q_{CO}$  is the cardiac output only here is expressed in L/minute.

## (2) ECMO recirculation term

$Q_{recirc}$  has been mathematically described as a function of the  $Q_{ECMO}$ .<sup>(12-14)</sup> Using the optimized femoral-jugular configuration, with a  $Q_{ECMO}$  of 5000mL, it is expected a recirculation rate up to 20%.<sup>(12)</sup> During low  $Q_{ECMO}$  rate, the  $Q_{recirc}$  varies linearly according to the  $Q_{ECMO}$ ,<sup>(14)</sup> however, at higher  $Q_{ECMO}$  rate this relation of  $Q_{recirc}$  with  $Q_{ECMO}$  is non-linear (exponential function).<sup>(14)</sup>

Intuitively, the  $Q_{CO}$  is also a modulator of the recirculation once keeping  $Q_{ECMO}$  stable; the higher the  $Q_{CO}$ , the higher will be the right ventricular drainage of the cannulas region and smaller the recirculation rate due to the ventricular drainage of the arterial cannula blood output. In this way, an extremely low  $Q_{CO}$  is responsible for almost 100% of arterial cannula blood recirculation.<sup>(14)</sup> As a higher  $Q_{ECMO}$  is directly associated with a higher  $Q_{recirc}$ , and a higher  $Q_{CO}$  is associated with a lower  $Q_{recirc}$ , the equation was fitted using recirculation rate against the  $Q_{ECMO}/Q_{CO}$  ratio.

The recirculation rate equation was created as a single exponential function (basic equation:  $f(x) = a * (1 - b^x)$ ), where  $f(x)$  is the recirculation rate and  $x$  is the  $Q_{ECMO}/Q_{CO}$  ratio. Fitting all the data exposed above resulted in the following equation:

$$\text{Recirculation rate (\%)} = 29.1321 * (1 - 0.2791^{Q_{\text{ECMO}}/Q_{\text{CO}}})$$

From here on, the  $Q_{\text{CO}}$  and  $Q_{\text{ECMO}}$  are expressed in mL/minute.

Plotting the fitted equation with  $Q_{\text{ECMO}}$  resulted in the following graphs:

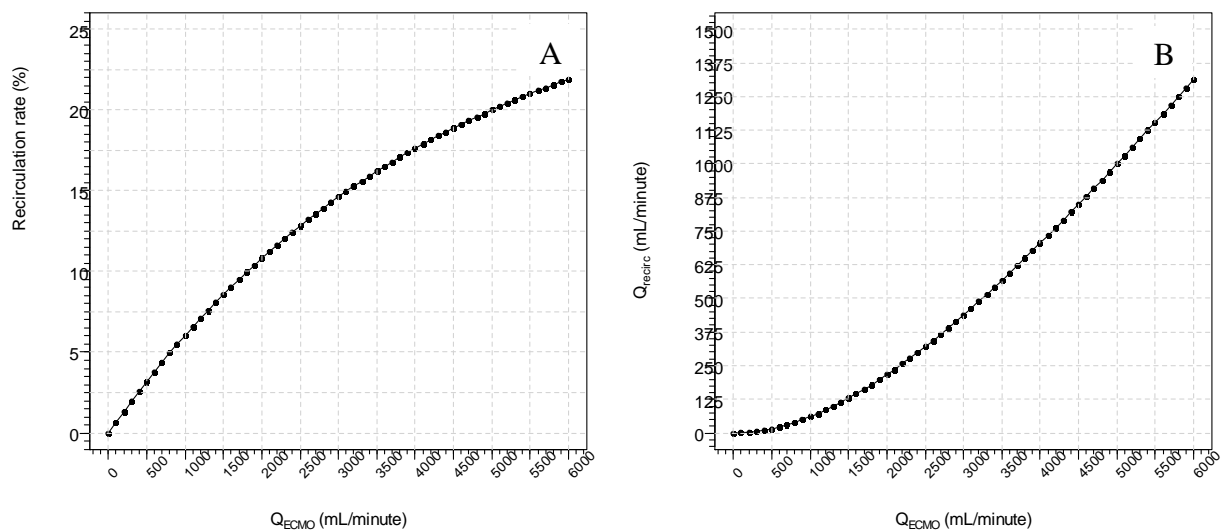

**Figure 3S** - Association of extracorporeal membrane oxygenation blood flow with recirculation rate (**Panel A**) and extracorporeal membrane oxygenation blood flow with extracorporeal membrane oxygenation recirculation blood flow (**Panel B**). In both simulations, cardiac output was fixed in 5500mL/minute.

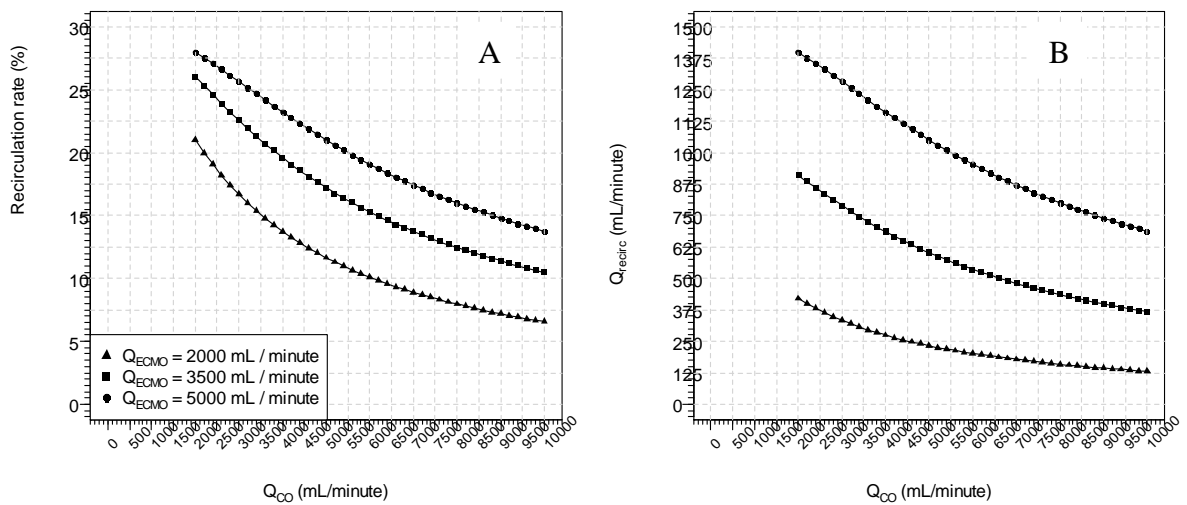

**Figure 4S** - Association of cardiac output with the recirculation rate (**Panel A**) and cardiac output with extracorporeal membrane oxygenation recirculation blood flow (**Panel B**). In both simulations, cardiac output varied from 2000 to 10,000mL/minute. Three different extracorporeal membrane oxygenation blood flows were simulated in order to demonstrate the interaction between both variables.

The recirculating blood flow carries  $C_{PostO_2}$ , therefore there will be not oxygenation of this amount of blood passing through the oxygenator. Thus, the effective  $Q_{ECMO}$  (the partition of  $Q_{ECMO}$  which will really be oxygenated) will be defined as:

$$Q_{ECMO \text{ effective}} (Q_{ECMO \text{ eff}}) = Q_{ECMO} - Q_{recirc}$$

The  $Q_{ECMO \text{ eff}}$  plotted against the  $Q_{ECMO}$  (with  $Q_{CO}$  simulated in 2000, 5000, and 10,000mL) is shown below:

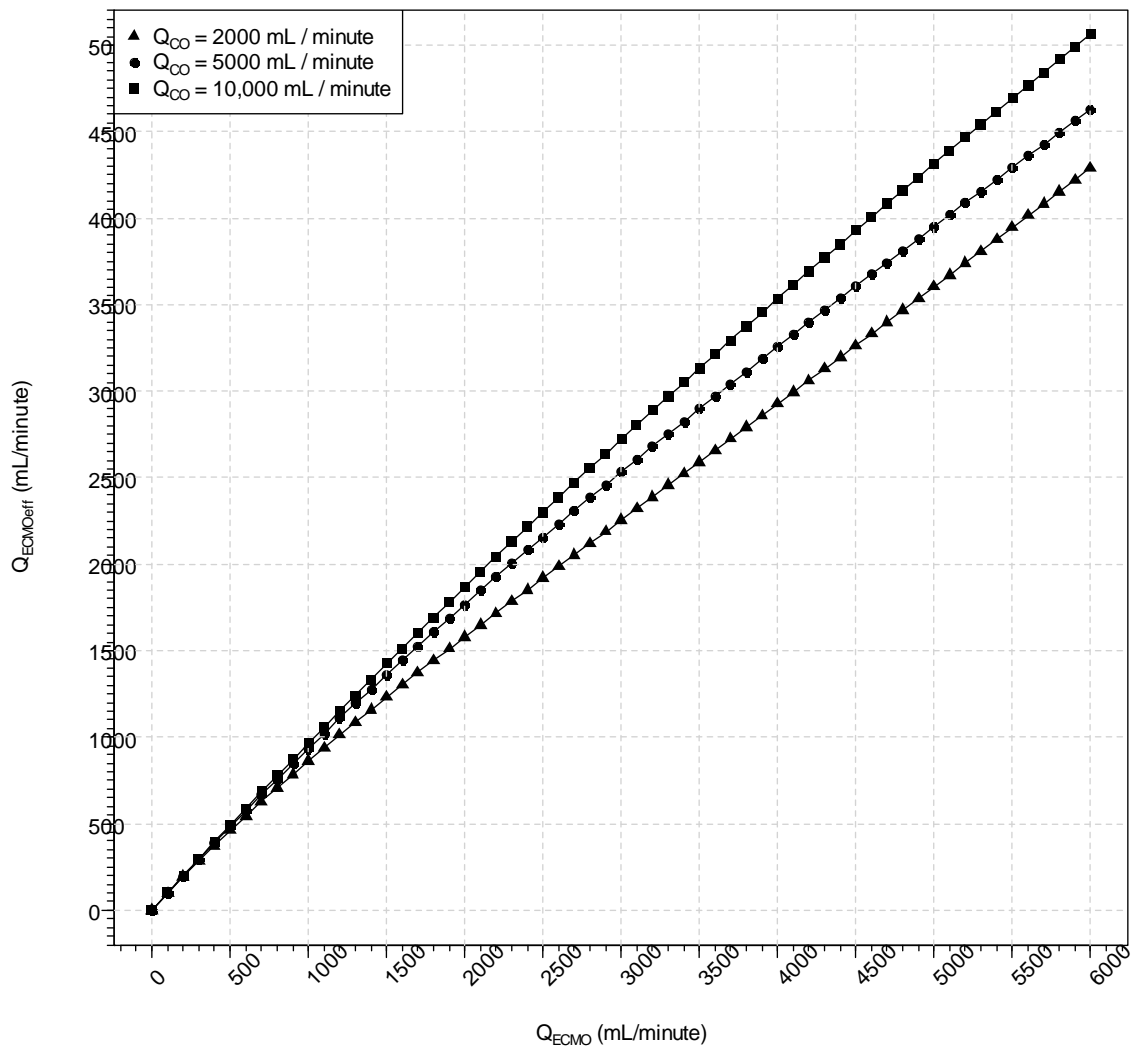

**Figure 5S** - Association of extracorporeal membrane oxygenation blood flow with the effective ECMO blood flow ( $Q_{ECMO,eff}$ ) in three different cardiac output.

### (3) Post-oxygenator oxygen content ( $C_{PostO_2}$ )

The  $FiO_2$  in the oxygenator sweep gas flow was considered 100%. Considering the oxygenator as efficient, the hemoglobin will ever be 100% saturated by oxygen. The  $P_{PostO_2}$  at higher  $Q_{ECMO}$  is expected to be lower than  $P_{PostO_2}$  at lower  $Q_{ECMO}$ .<sup>(15)</sup> The  $P_{PostO_2}$  at  $Q_{ECMO} = 5500 - 6000$  mL/minute is expected to be  $\geq 150$  mmHg,<sup>(16)</sup> and a  $Q_{ECMO}$  as low as 2000 mL/minute the  $P_{PostO_2}$  is expected to be around 400 mmHg, with a non-linear  $P_{PostO_2}$  decrement with progressive higher  $Q_{ECMO}$ .<sup>(12,15)</sup> In order to fit this non-

linear  $P_{\text{PostO}_2}$  decrement, the formula used was based on an exponential decay  $f(x) = a + b * \exp(1)^{-c * x}$ , where  $f(x)$  is the  $P_{\text{PostO}_2}$  and  $x$  is the  $Q_{\text{ECMO}}$ . The final plus 1 was inserted to avoid zero as denominator. The result of fitting the above data was:

$$P_{\text{PostO}_2} = 130.5 + 319.5 * \exp(1)^{-0.0005 * Q_{\text{ECMO}}}$$

The  $C_{\text{PostO}_2}$  was then calculated as:

$$C_{\text{PostO}_2} = 0.0031 * P_{\text{PostO}_2} * 1.36 * \text{Hb}$$

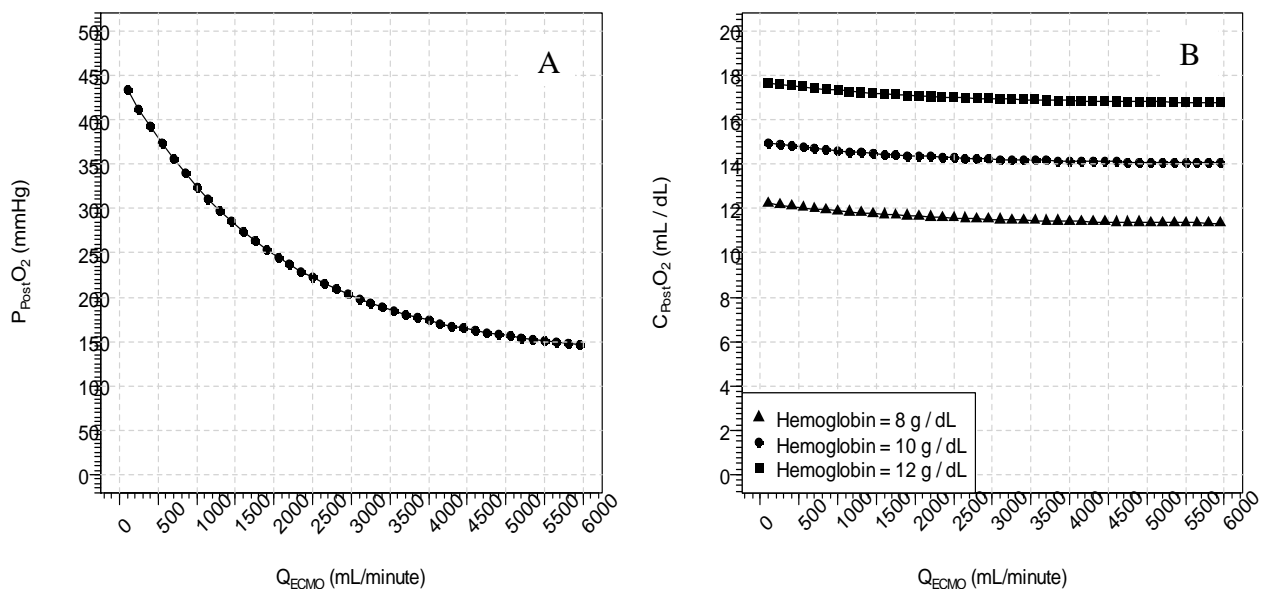

**Figure 6S** - Post-extracorporeal membrane oxygenation partial pressure of oxygen (**Panel A**) and post-extracorporeal membrane oxygenation oxygen blood content (**Panel B**) as a function of extracorporeal membrane oxygenation blood flow. The **Panel B** shows the association with three different levels of hemoglobin.

(4) The oxygen transfer in the oxygenator

The oxygen transfer is defined as following:<sup>(15)</sup>

$$\text{Oxygen transfer (O}_2 \text{ transfer)} = (C_{\text{PostO}_2} - C_{\text{PreO}_2}) * Q_{\text{ECMOeff}}$$

The  $C_{\text{PreO}_2}$  as a separated fraction from the recirculated blood is considered equal to  $C_{\text{VO}_2}$ . The simulation of  $\text{O}_2$  transfer as function of  $Q_{\text{ECMO}}$  leads to the main result of this modeling, and is presented in the results section of the main manuscript.

(5) Right atrial oxygen venous content ( $C_{\text{RAO}_2}$ )

The coronary sinus blood flow (1mL/kg/minute) was considered negligible to an adult. The  $C_{\text{RAO}_2}$  is the mean of the  $C_{\text{PostO}_2}$  and  $C_{\text{VO}_2}$  pondered according to the blood flows, that is:

$$Q_{\text{Eshunt}} = Q_{\text{CO}} - Q_{\text{ECMOeff}}$$

$$C_{\text{RAO}_2} = [(C_{\text{PostO}_2} * Q_{\text{ECMOeff}}) + C_{\text{VO}_2} * (Q_{\text{Eshunt}})] / Q_{\text{CO}}$$

(6) Arterial oxygen venous content ( $C_{\text{aO}_2}$ )

The  $C_{\text{aO}_2}$  was calculated based on the pulmonary shunt as following:

$$C_{\text{aO}_2} = C_{\text{cO}_2} - Q_{\text{S}}/Q_{\text{T}} * (C_{\text{cO}_2} - C_{\text{VO}_2})$$

$Q_{\text{S}}/Q_{\text{T}}$  already includes the physiological shunt, mainly constituted by the bronchial circulation. The  $C_{\text{cO}_2}$  is calculated based on the oxygen alveolar partial pressure:

$$P_{\text{AO}_2} = F_{\text{IO}_2} * (P_{\text{atm}} - P_{\text{H}_2\text{O}}) - P_{\text{aCO}_2} / RQ$$

Where  $P_{atm}$  is the barometric pressure (~ 690mmHg), RQ is the respiratory quotient (~ 0.8), and  $P_{H_2O}$  was considered as 47mmHg.

Considering the partial capillary pressure of oxygen equal to the  $P_{AO_2}$ , and hemoglobin oxygen saturation of 100%,  $C_{cO_2}$  was defined as:

$$C_{cO_2} = 0.0031 * P_{AO_2} + 1.36 * Hb * 1$$

Combining those three last equations, the  $C_{aO_2}$  was calculated as following:

$$C_{aO_2} = [0.0031 * (FiO_2 * 643 - PaCO_2 / 0.8) + 1.36 * Hb * 1] - Q_S/Q_T * \{ [0.0031 * (FiO_2 * 643 - PaCO_2 / 0.8) + 1.36 * Hb * 1] - [(C_{PostO_2} * Q_{ECMOeff}) + C_{VO_2} * Q_{Eshunt}] / Q_{CO} \}$$

(7) Arterial oxygen saturation ( $SatO_2$ )

$SatO_2$  was calculated as following:

$$SatO_2 = C_{aO_2} / (1.36 * Hb)$$

After this point, the mathematical circuit reenters, closing the loop.

### 1.2.3. Looping and interactions to reach the equilibrium

For starting equilibrium cycle of mathematical circuit (Figure 7S), the arterial saturation at the time of ECMO initiation (64%) was used. For any new variable tested, the circuit was recycled until reaching the equilibrium. In order to assure the equilibrium of the  $SatO_2$ , twenty iterations (cycles) were tested (see the appendix to check the script).

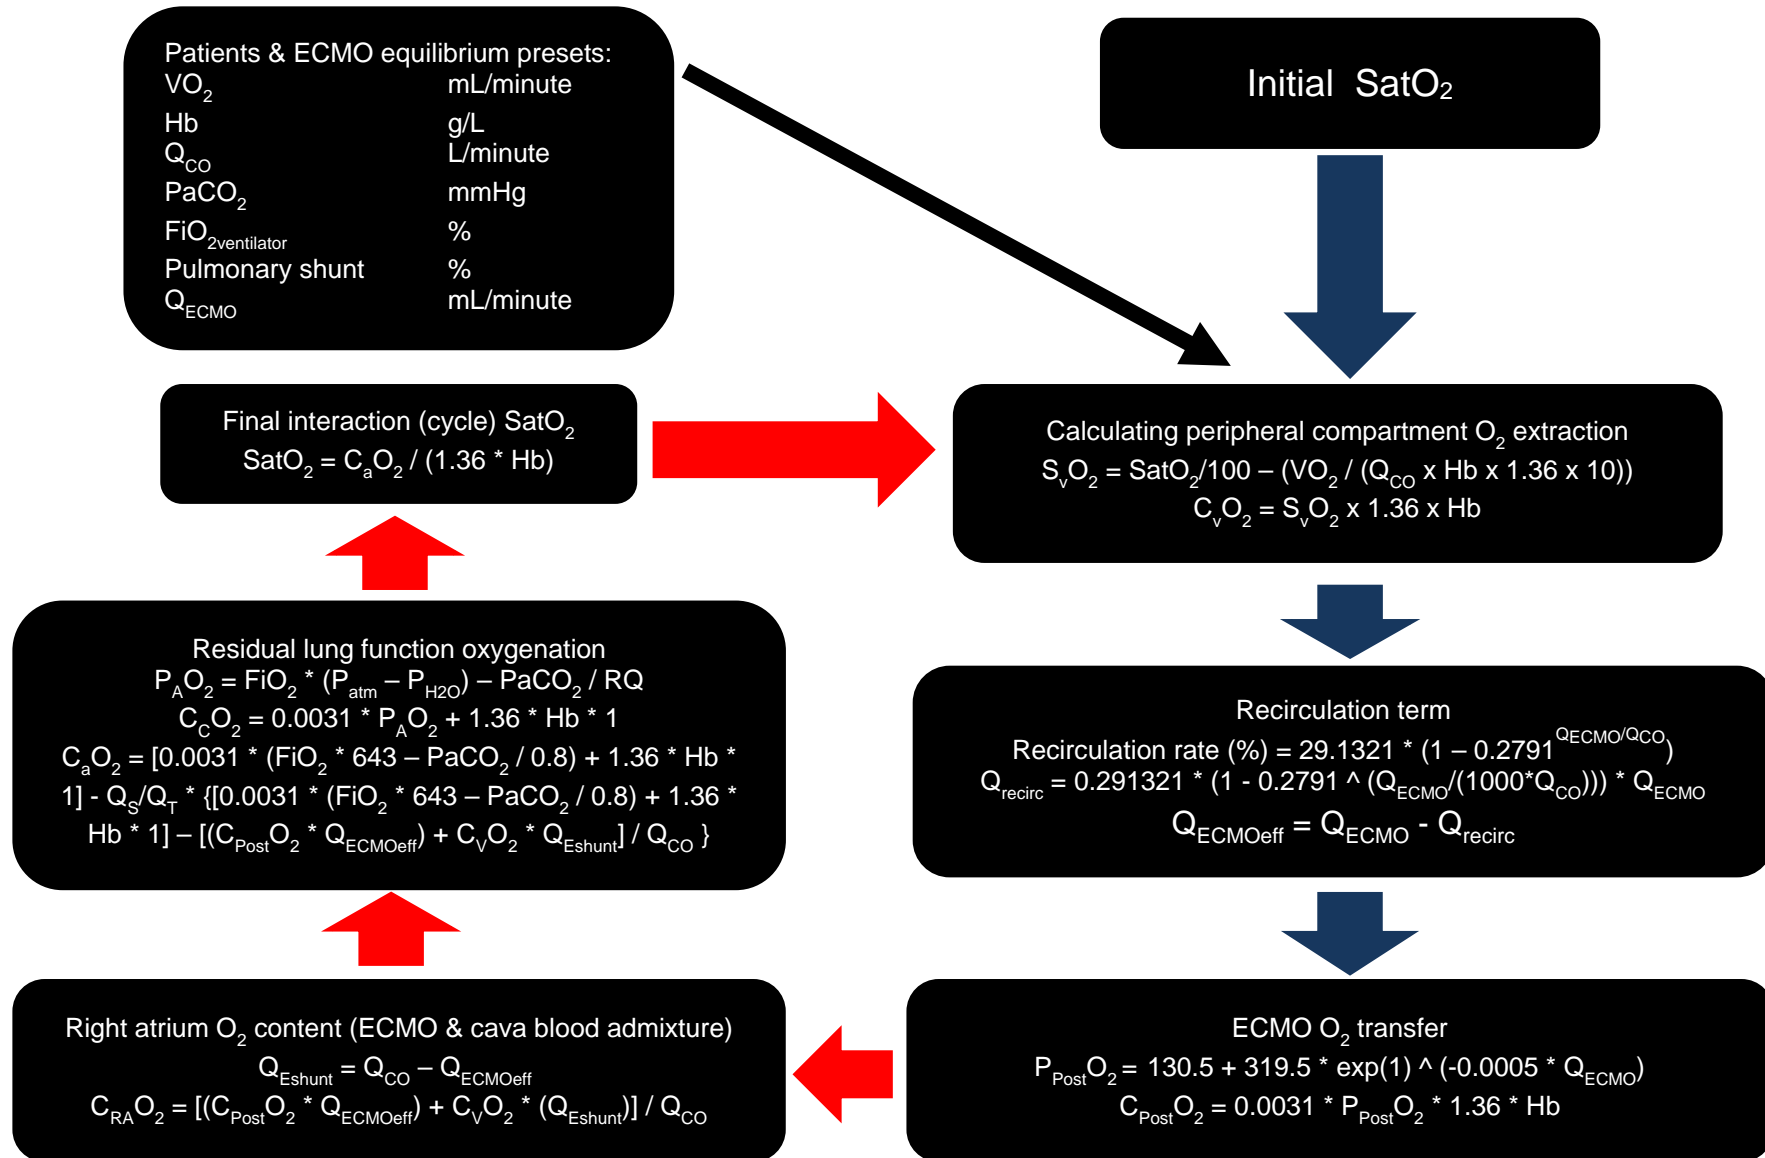



**Figure 7S** - Visual inspection of each step described above closing the interactions. Twenty cycles (interactions) were considered to reach the equilibrium. ECMO - extracorporeal membrane oxygenation;  $VO_2$  – oxygen consumption; Hb – hemoglobin;  $Q_{CO}$  - cardiac output;  $PaCO_2$  - partial pressure of carbon dioxide;  $FiO_{2ventilator}$  - Ventilator fraction of inspired oxygen;  $Q_{ECMO}$  - extracorporeal membrane oxygenation blood flow;  $SatO_2$  - oxygen saturation;  $C_aO_2$ - arterial content of oxygen;  $P_AO_2$  - alveolar oxygen partial pressure;  $FiO_2$  - fraction of inspired oxygen;  $P_{atm}$  - atmospheric pressure;  $P_{H_2O}$  - partial pressure of water; RQ - respiratory coefficient;  $C_cO_2$  - pulmonary alveolar capillary blood oxygen content;  $Q_S/Q_T$  - shunt fraction;  $C_{postO_2}$  - post-extracorporeal membrane oxygenation oxygen blood content;  $Q_{ECMOeff}$  - ECMO effective blood flow;  $C_vO_2$  - venous oxygen blood content;  $Q_{Eshunt}$  - extracorporeal membrane oxygenation parallel cava blood flow (cava blood flow without extracorporeal membrane oxygenation);  $Q_{CO}$  - cardiac output;  $C_{RAO_2}$  - right atrium oxygen content;  $C_{postO_2}$  - post-extracorporeal membrane oxygenation oxygen blood content;  $S_vO_2$  - Oxygen mixed venous saturation;  $Q_{recirc}$  - extracorporeal membrane oxygenation recirculation blood flow;  $P_{postO_2}$  - Oxygen partial pressure post-ECMO.

Oxygen delivery, carbon dioxide removal, energy transfer to lungs and pulmonary hypertension behavior during venous-venous extracorporeal membrane oxygenation support

Some basic simulations were done to test the model consistency and stability. A clinical scenario is shown below, in which a patient is initiating ECMO support. The clinical variables are depicted in the graphs' legend. Three different hemoglobin levels were simulated to clarify the freedom of the model. The oxygen saturation and transfer are shown:

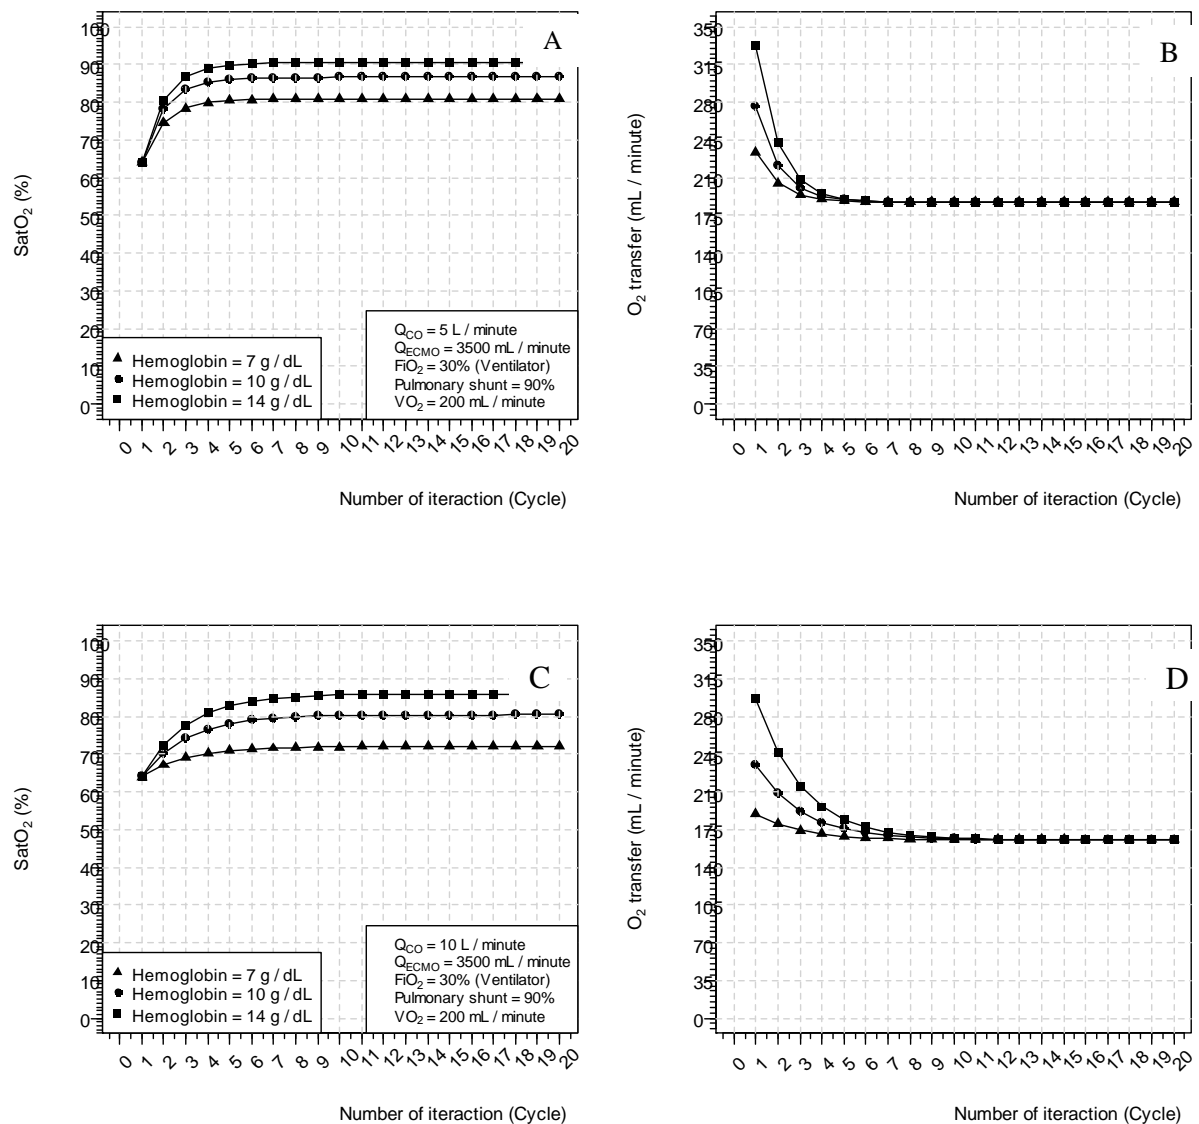

**Figure 8S** - A patient soon after extracorporeal membrane oxygenation initiation, already ultraprotectively ventilated is shown in **Panels A and B**, this patient presented an elevation of cardiac output to 10L/minute and the new clinical scenario with hypoxemia is shown in **Panels C and D**. SatO<sub>2</sub> - oxygen saturation; Q<sub>CO</sub> - cardiac output; Q<sub>ECMO</sub> - extracorporeal membrane oxygenation blood flow; FiO<sub>2</sub> - fraction of inspired oxygen; VO<sub>2</sub> - oxygen consumption.

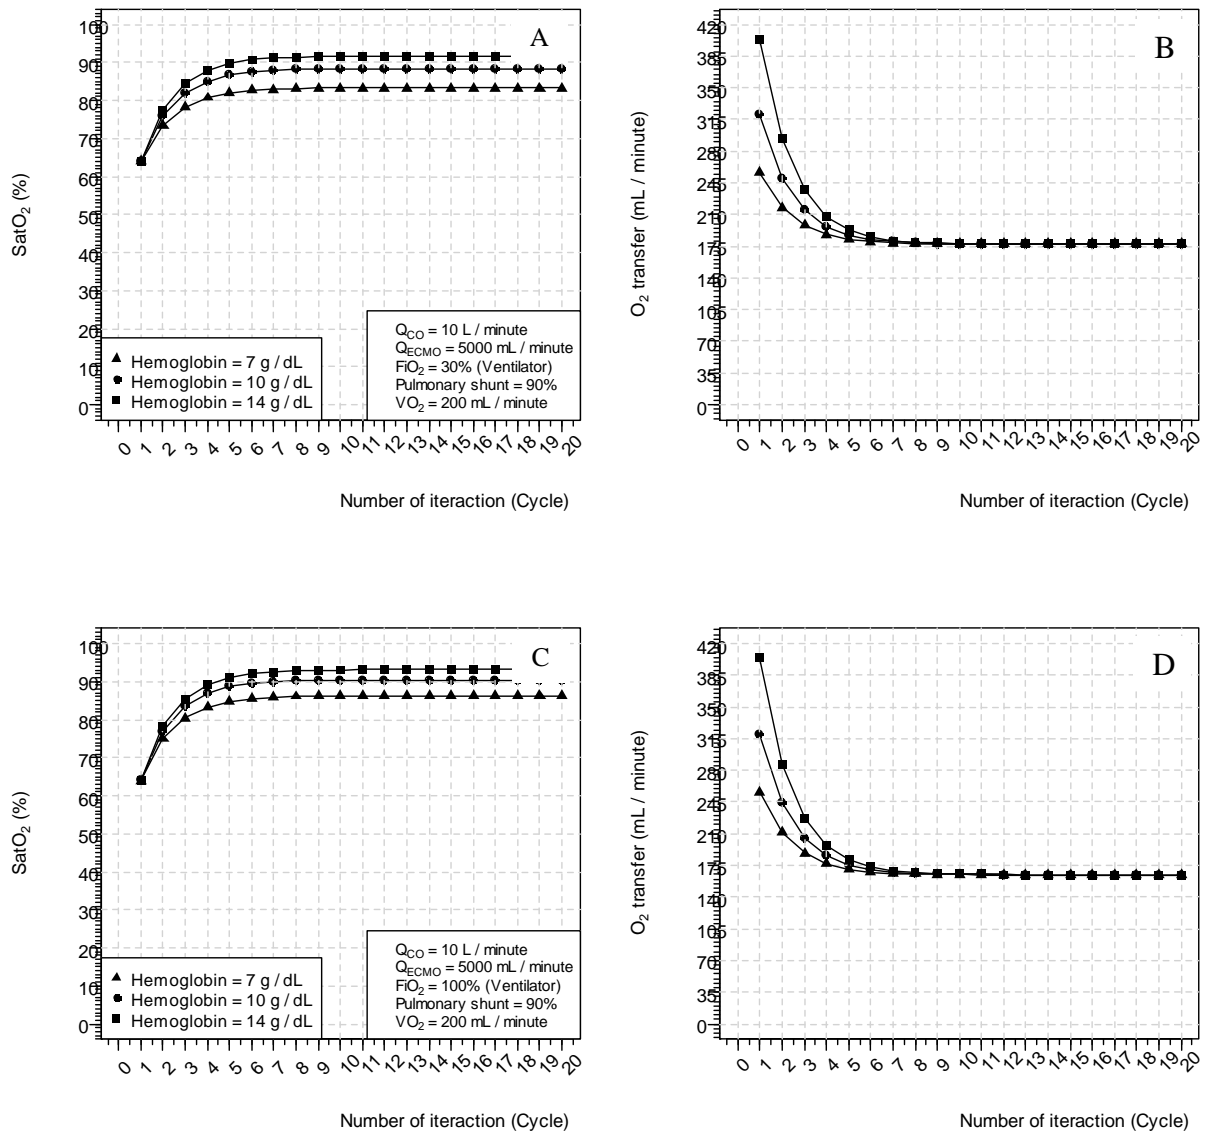

**Figure 9S** - As the patient was hypoxemic, the extracorporeal membrane oxygenation blood flow was increased to 5000 mL/minute as shown in **Panels A and B**, the ventilator fraction of inspired oxygen was then increased to 100% as shown in **Panels C and D**. SatO<sub>2</sub> – oxygen saturation; Q<sub>CO</sub> - cardiac output; Q<sub>ECMO</sub> - extracorporeal membrane oxygenation blood flow; FI<sub>O</sub><sub>2</sub> - fraction of inspired oxygen; VO<sub>2</sub> - oxygen consumption.

Oxygen delivery, carbon dioxide removal, energy transfer to lungs and pulmonary hypertension behavior during venous-venous extracorporeal membrane oxygenation support

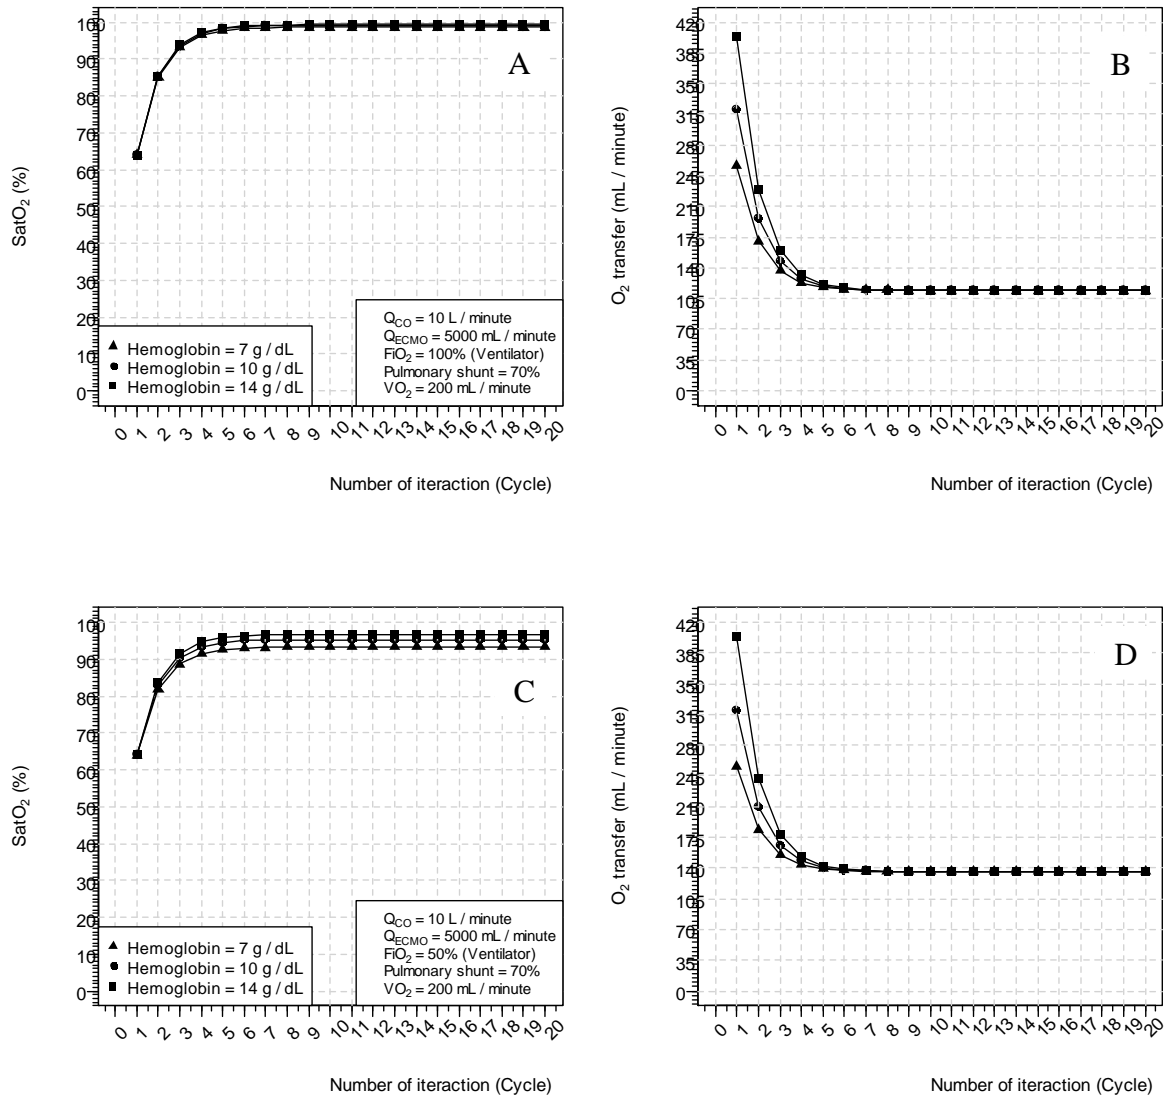

**Figure 10S** - The lungs of the patient were recruited with a high positive end-expiratory pressure, and the pulmonary shunt decreased to 70% as shown in **Panels A and B**, the ventilator fraction of inspired oxygen was then decreased to 70% as shown in **Panels C and D**. SatO<sub>2</sub> - oxygen saturation; Q<sub>CO</sub> - cardiac output; Q<sub>ECMO</sub> - extracorporeal membrane oxygenation blood flow; FiO<sub>2</sub> - fraction of inspired oxygen; VO<sub>2</sub> - oxygen consumption.

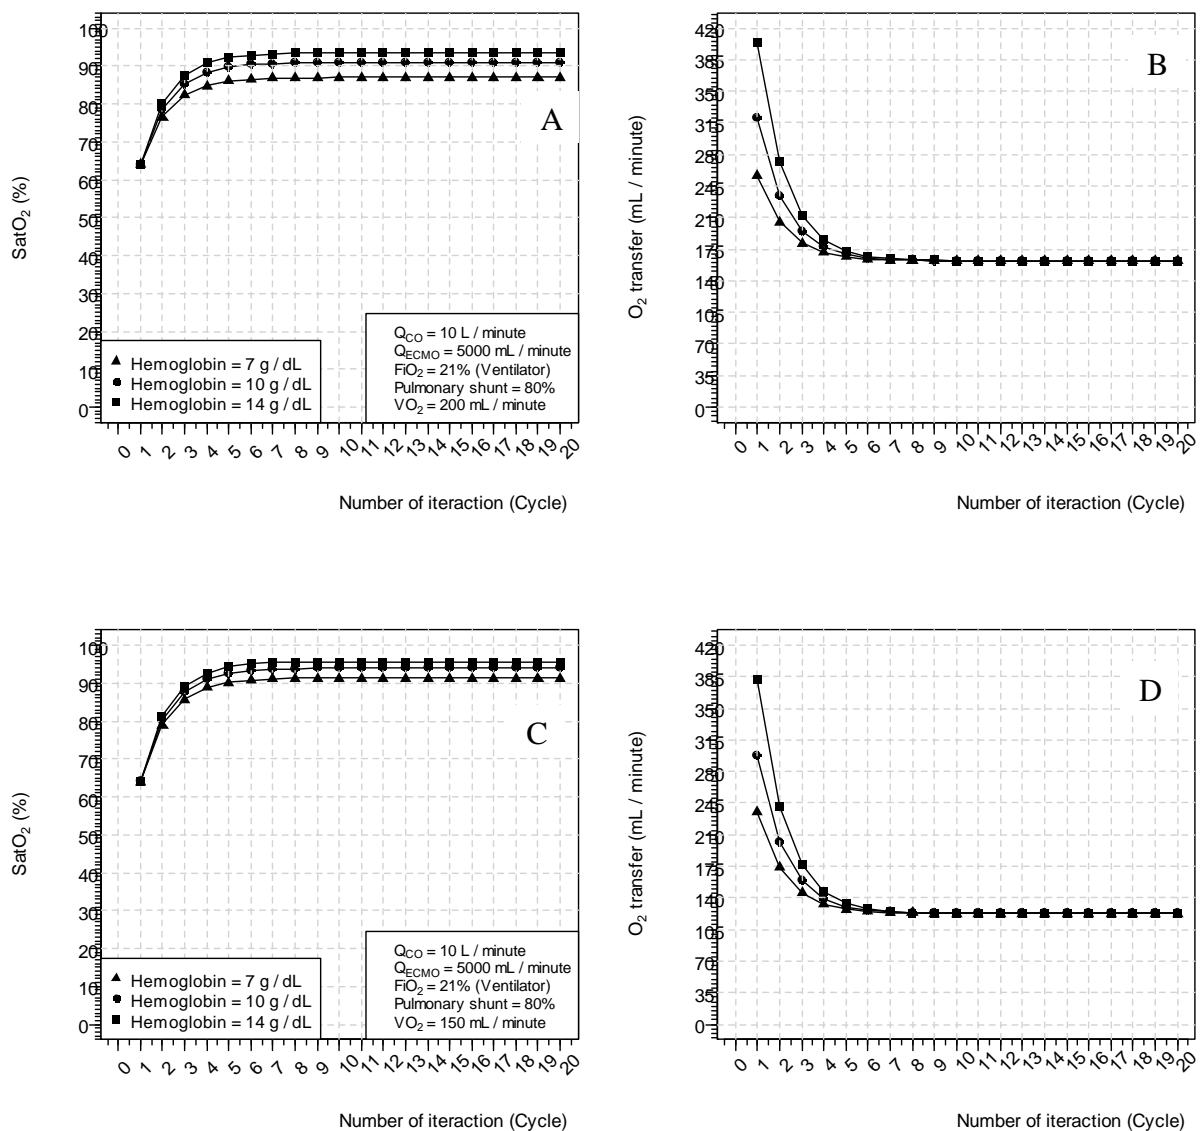

**Figure 11S** - With the oxygenation improvement, the fraction of inspired oxygen was further decreased to 21%, however the lungs de-recruited and pulmonary shunt increased to 80% as shown in **Panels A and B**, the patient clinical condition improved and the VO<sub>2</sub> decreased to 150mL/minute as shown in **Panels C and D**. SatO<sub>2</sub> - oxygen saturation; Q<sub>CO</sub> - cardiac output; Q<sub>ECMO</sub> - extracorporeal membrane oxygenation blood flow; FiO<sub>2</sub> - fraction of inspired oxygen; VO<sub>2</sub> - oxygen consumption.

Oxygen delivery, carbon dioxide removal, energy transfer to lungs and pulmonary hypertension behavior during venous-venous extracorporeal membrane oxygenation support

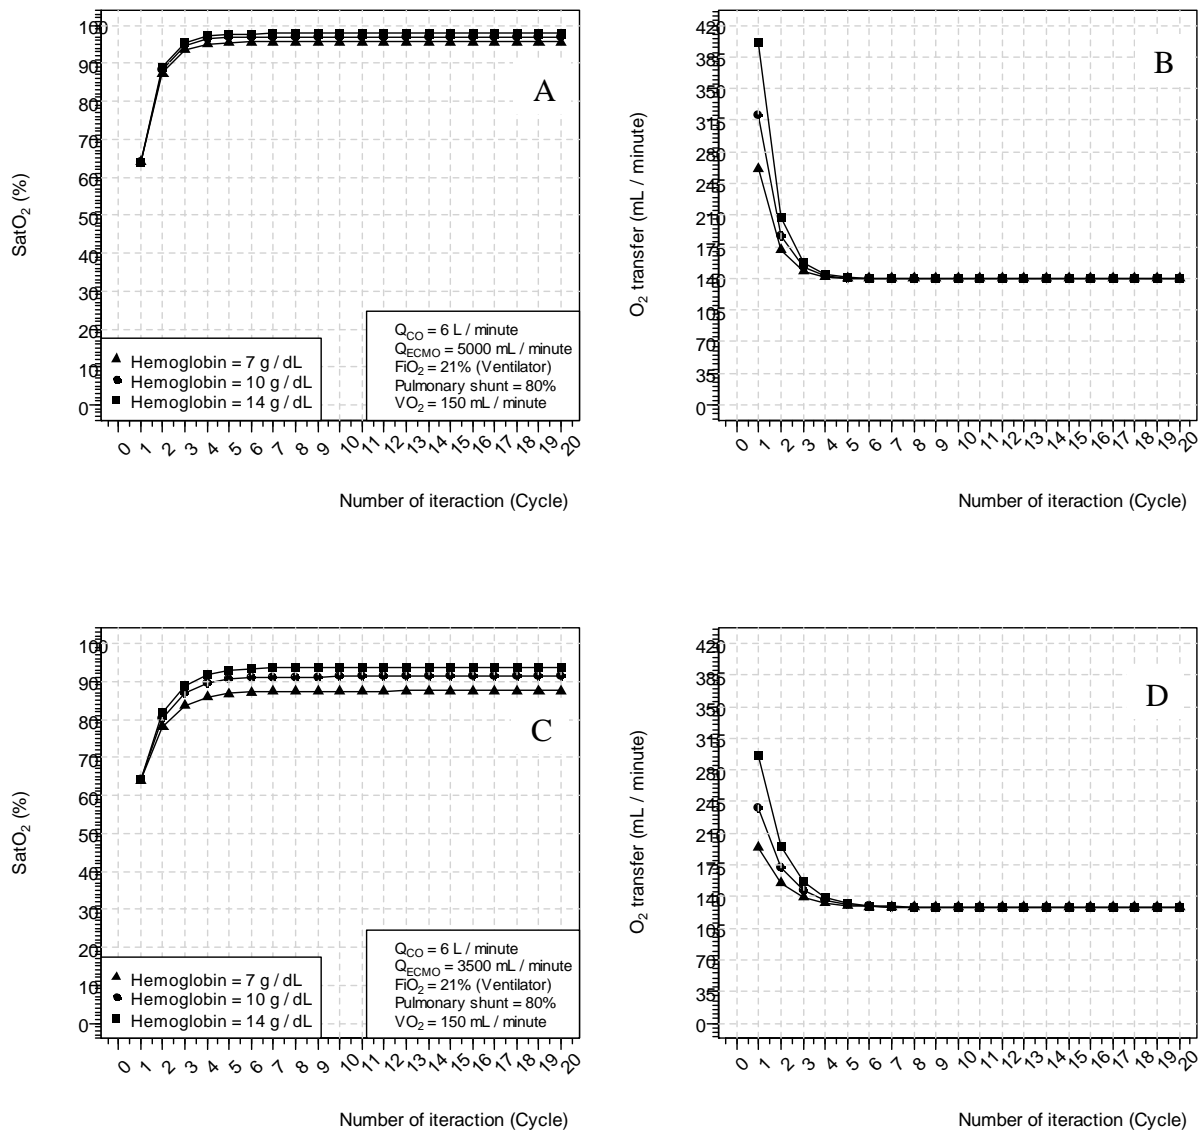

**Figure 12S** - Now with patient's improvement the cardiac output decreased to 6 L/minute as shown in **Panels A and B**, due to the patient oxygenation improvement, the extracorporeal membrane oxygenation blood flow was reduced to 3500mL/minute as shown in **Panels C and D**. SatO<sub>2</sub> - oxygen saturation; Q<sub>CO</sub> - cardiac output; Q<sub>ECMO</sub> - extracorporeal membrane oxygenation blood flow; FiO<sub>2</sub> - fraction of inspired oxygen; VO<sub>2</sub> - oxygen consumption.

The behavior of equilibrated values was compatible with ECMO-supported patients at the bedside.

### 1.3. Arterial carbon dioxide and total amount of carbon dioxide transfer

The CO<sub>2</sub> modeling was also based on femoral – jugular venous-venous configuration. The patient – ECMO coupling was considered as in the figure 2S.

#### 1.3.1. Standard formulas used

Additionally to the 1.2.1 item, the blood CO<sub>2</sub> content was calculated using the Douglas et al. formula, in which the CO<sub>2</sub> content in three compartments – dissolved in plasma, as bicarbonate and linked to hemoglobin –, were considered.<sup>(17)</sup>

$$- pK = 6.086 + (0.042 * (7.4 - pH)) + ((38 - temperature) * 0.00472 + (0.00139 * (7.4 - pH)))$$

$$- s \text{ (CO}_2 \text{ solubility)} = 0.0307 + (0.00057 * (37 - temp)) + (0.00002 * (37 - temp)^2)$$

$$- \text{Plasma CO}_2 = 2.226 * s * P_{\text{LCO}_2} * (1 + 10^{(pH-pK)})$$

$$- \text{Blood local oxygen content (C}_{\text{LCO}_2}) = (1 - (((0.0289 * \text{Hb}) / (3.352 - 0.456 * (\text{SatO}_2 / 100) * (8.142 - pH)))) * \text{Plasma CO}_2$$

#### 1.3.2. Creating mathematical terms of the carbon dioxide modeling

(1) The recirculation term was used as described in the 1.2.2 item.

As described in the methods section, the patient had a P<sub>a</sub>CO<sub>2</sub> = 62mmHg just before ECMO initiation.

(2) Initial PvCO<sub>2</sub> was modeled using a predetermined VCO<sub>2</sub>, which will add CO<sub>2</sub> (CCO<sub>2</sub><sub>added</sub>) to the arterial blood resulting in the C<sub>v</sub>CO<sub>2</sub> (mL of CO<sub>2</sub> / 100mL of blood).

Oxygen delivery, carbon dioxide removal, energy transfer to lungs and pulmonary hypertension behavior during venous-venous extracorporeal membrane oxygenation support

The  $VCO_2$  will be carried out by blood in a minute by a volume of blood equivalent to  $Q_{CO}$ . Therefore the  $CCO_{2added}$  was calculated as following:

$$CCO_{2added} = VCO_2 / (Q_{CO} * 10)$$

Taking into account the  $C_aCO_2$ , calculated as already described in the 1.3.1 item, the  $C_vCO_2$  was calculated as following:

$$C_vCO_2 = C_aCO_2 + CCO_{2added}$$

Still using the Douglas formula rearranged,<sup>(17)</sup> the  $P_vCO_2$  was calculated as following:

$$P_vCO_2 = \text{Plasma } CO_2 / (2.226 * s * (1 + 10^{(ph-pk)}))$$

The venous pH was considered as 0.02 lower than the arterial pH, as described in septic patients.<sup>(18)</sup>

Testing the consistency of  $P_vCO_2$ , the following graphs were built.



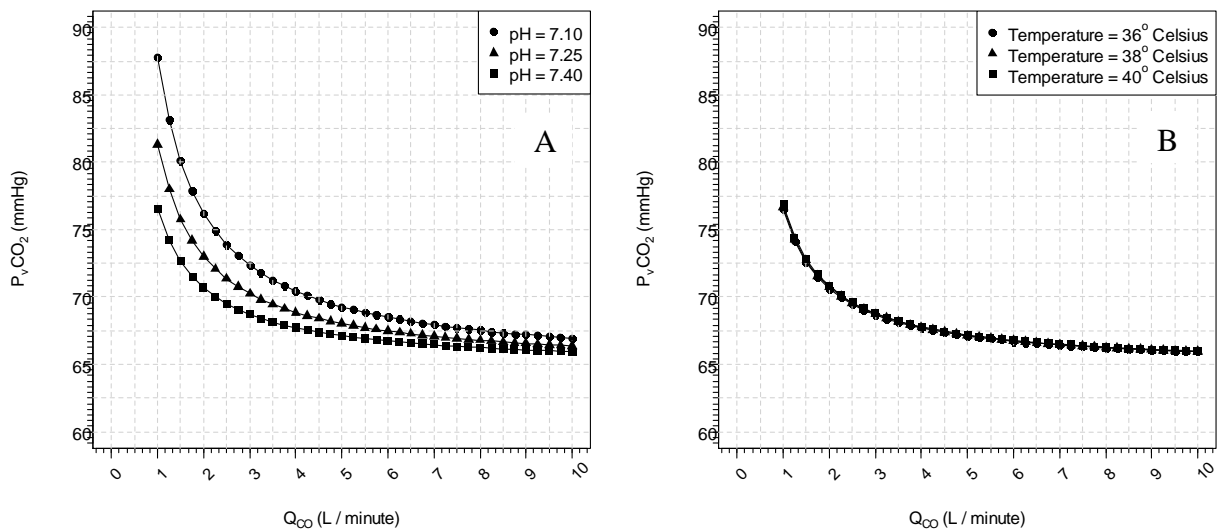

**Figure 13S** - The  $P_vCO_2$  behavior with progressive cardiac output elevation with fixed values of  $VCO_2 = 150\text{mL/minute}$ , hemoglobin =  $10\text{g/dL}$ , and initial partial pressure of carbon dioxide of  $62\text{mmHg}$ . **Panel A** shows this behavior with different pHs (fixed temperature =  $37^\circ\text{Celsius}$ ) and **Panel B** shows this behavior with different body temperatures (fixed pH =  $7.40$ ).  $P_vCO_2$  - mixed venous carbon dioxide partial pressure.  $VCO_2$  – carbon dioxide production

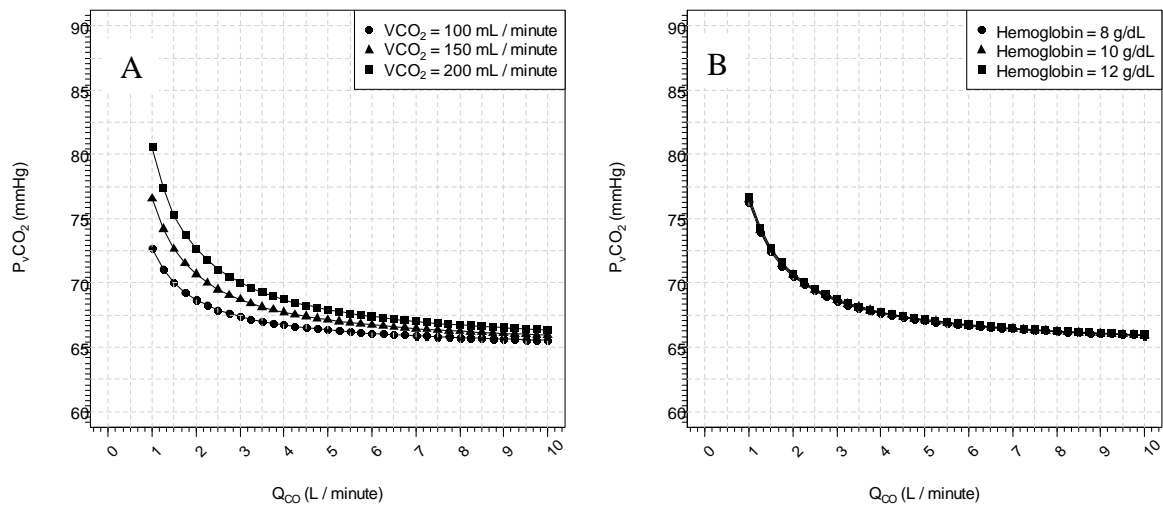

**Figure 14S** -The  $P_vCO_2$  behavior with progressive cardiac output elevation with fixed values of pH =  $7.40$ , temperature =  $37^\circ\text{Celsius}$ , and initial partial pressure of carbon dioxide of  $62\text{mmHg}$ . **Panel A** shows this behavior with different  $VCO_2$ s (fixed hemoglobin =  $10\text{g/dL}$ ) and **Panel B** shows this behavior with different hemoglobins (fixed  $VCO_2 = 150\text{mL/minute}$ ).  $VCO_2$  – carbon dioxide production.

### (3) ECMO CO<sub>2</sub> transfer (CO<sub>2t</sub>)

The CO<sub>2t</sub> was calculated as described previously by our group.<sup>(15)</sup> The CO<sub>2t</sub> depends on sweep gas flow, hemoglobin level, Q<sub>ECMO</sub>, and P<sub>v</sub>CO<sub>2</sub>. The CO<sub>2t</sub> formula used was:

$$\text{CO}_{2t} = (\text{Q}_{\text{ECMO}} * 0.017) + (\text{sweep} * 32.91) + (\text{P}_{\text{vCO}_2} * 1.192) - (\text{Hb} * 3.478)$$

### (4) CO<sub>2</sub> ECMO removal (CO<sub>2r</sub>) and C<sub>post</sub>CO<sub>2</sub>

Using the same rationale of volume / time used to calculate P<sub>v</sub>CO<sub>2</sub>, the CO<sub>2r</sub> was calculated as:

$$\text{CO}_{2r} = (\text{Q}_{\text{ECMO}} * \text{C}_{\text{vCO}_2} / 100) - \text{CO}_{2t}$$

The C<sub>post</sub>CO<sub>2</sub> was then calculated as:

$$\text{C}_{\text{postCO}_2} = \text{CO}_{2r} * 100 / \text{Q}_{\text{ECMO}}$$

### (5) Modeling C<sub>RA</sub>CO<sub>2</sub>

The C<sub>RA</sub>CO<sub>2</sub> was calculated through the proportional C<sub>v</sub>CO<sub>2</sub> and C<sub>post</sub>CO<sub>2</sub> admixture. The proportion of each CO<sub>2</sub> content was extracted from Q<sub>ECMO</sub> and Q<sub>Eshunt</sub>.

$$\text{C}_{\text{RACO}_2} = (\text{Q}_{\text{ECMO}} / (\text{Q}_{\text{CO}} * 1000)) * \text{C}_{\text{postCO}_2} + (\text{Q}_{\text{Eshunt}} / (\text{Q}_{\text{CO}} * 1000)) * \text{C}_{\text{vCO}_2}$$

### (6) Lung ventilation and decarboxylation

The effective lung minute ventilation and decarboxylation was modeled based on end-tidal CO<sub>2</sub> (EtCO<sub>2</sub>). Barometric pressure was considered 690mmHg. The proportion of CO<sub>2</sub> removed in the residual function of native lungs was considered as EtCO<sub>2</sub> / 690. The volume of CO<sub>2</sub> removed by the native lungs (CO<sub>2rl</sub>) was then considered as:

$$CO_{2rl} = \text{Respiratory rate} * \text{tidal volume} * EtCO_2 / 690$$

The final C<sub>c</sub>CO<sub>2</sub> was calculated based on the proportional flow through the ventilated lung regions as:

$$C_cCO_2 = \{[C_{RA}CO_2 * (Q_{CO} - Q_{Lshunt})] - CO_{2rl}\} / [100 * (Q_{CO} - Q_{Lshunt})]$$

#### (7) Modeling P<sub>a</sub>CO<sub>2</sub>

The C<sub>a</sub>CO<sub>2</sub> was calculated based on the proportion of Q<sub>Lshunt</sub> as:

$$C_aCO_2 = (C_{RA}CO_2 * Q_{Lshunt} / Q_{CO}) + C_cCO_2 * (Q_{Lshunt} - Q_{CO}) / Q_{CO}$$

At last, P<sub>a</sub>CO<sub>2</sub> was calculated using the Douglas method:

$$P_aCO_2 = \text{Plasma CO}_2 / (2.226 * s * (1 + 10^{(ph-pk)}))$$

This value of P<sub>a</sub>CO<sub>2</sub> re-enters the loop until stabilization.

#### 1.3.3. Looping and interactions to reach the equilibrium

For starting the equilibrium cycle of the mathematical circuit (Figure 15S), the arterial saturation at the time of ECMO initiation of 64% and an initial P<sub>a</sub>CO<sub>2</sub> of 62mmHg

Oxygen delivery, carbon dioxide removal, energy transfer to lungs and pulmonary hypertension behavior during venous-venous extracorporeal membrane oxygenation support

were used. For any new variable tested, the circuit was recycled until reaching the equilibrium. In order to assure the equilibrium of the  $P_aCO_2$ , eight hundred (cycles) were tested (see the appendix to check the script).

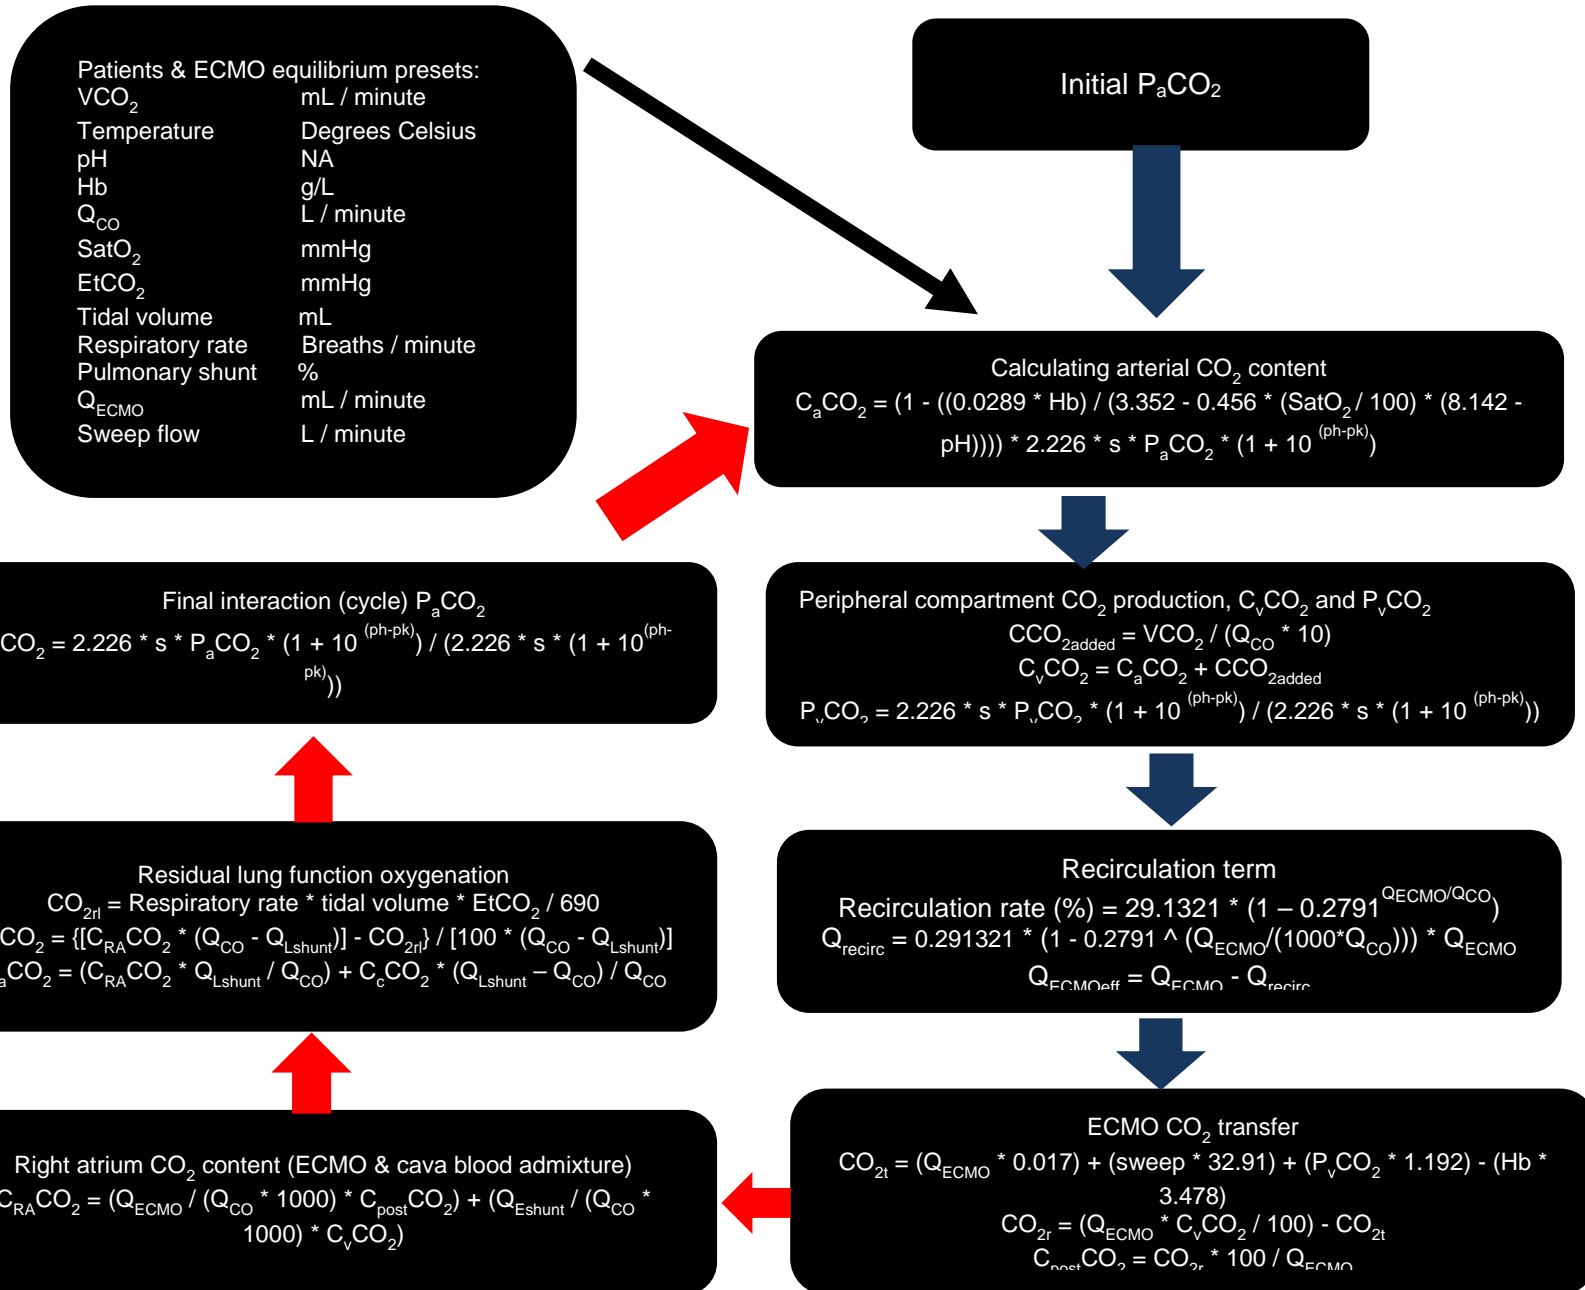

**Figure 15S** - Visual inspection of each step described above closing the interactions. Eight hundred cycles (interactions) were considered to reach the equilibrium. ECMO - extracorporeal membrane oxygenation; Hb - hemoglobin;  $Q_{CO}$  - cardiac output;  $SatO_2$  - oxygen saturation;  $EtCO_2$  - end-tidal carbon dioxide partial pressure;  $Q_{ECMO}$  - extracorporeal membrane oxygenation blood flow;  $PaCO_2$  - partial pressure of carbon dioxide;  $C_aCO_2$  - arterial content of carbon dioxide;  $CO_2$  - carbon dioxide;  $C_vCO_2$  - venous carbon dioxide blood content;  $PvCO_2$  - mixed venous carbon dioxide partial pressure;  $CCO_{2added}$  - added carbon dioxide content;  $VCO_2$  - carbon dioxide production;  $C_vCO_2$  - venous carbon dioxide blood content;  $Q_{ECMO}$  - extracorporeal membrane oxygenation blood flow;  $Q_{recirc}$  - extracorporeal membrane oxygenation recirculation blood flow;  $Q_{ECMOoff}$  - ECMO efficient blood flow;  $CO_{2t}$  - carbon dioxide transfer;  $CO_{2r}$  - carbon dioxide removed by native lungs;  $C_{postCO_2}$  - post-extracorporeal membrane oxygenation carbon dioxide blood content;  $C_{RAO_2}$  - right atrium oxygen content;  $C_cCO_2$  - pulmonary alveolar capillary carbon dioxide blood content;  $C_{RA}CO_2$  - right atrium carbon dioxide content;  $Q_{Lshunt}$  - pulmonary blood flow in shunt regions.

In order to test the model consistency and stability, as in the oxygenation model, some basic simulations were done. A clinical scenario is shown below, in which a patient is initiating ECMO support. The clinical variables are depicted in the graphs' legend. Three different hemoglobin levels were simulated to clarify the freedom of the model. The PaCO<sub>2</sub> and transfer are shown:

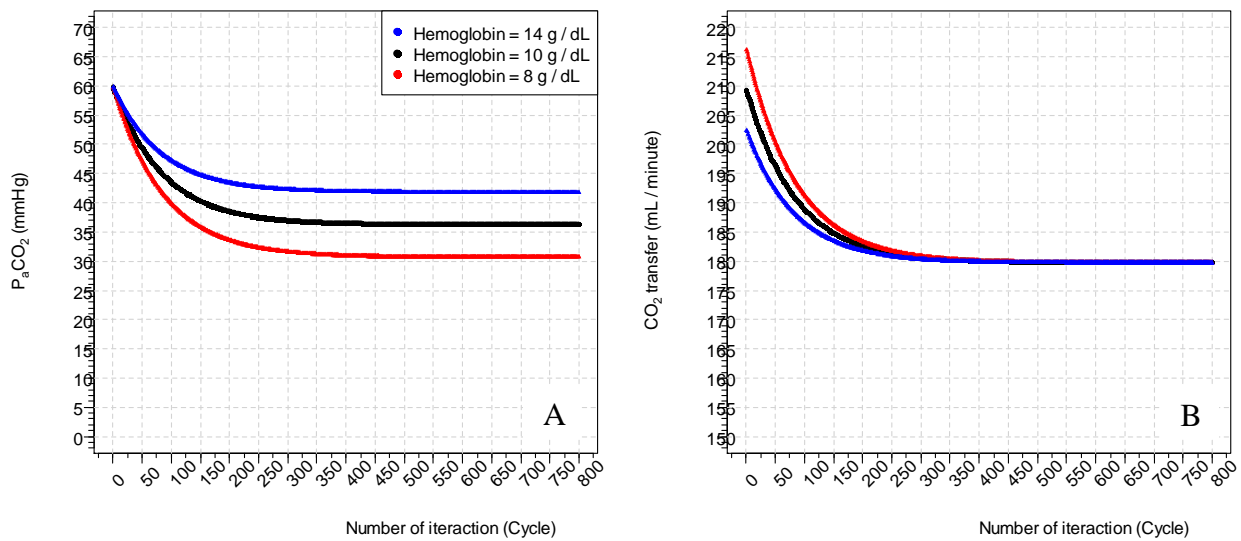

**Figure 16S** - Partial pressure of carbon dioxide (**Panel A**) after 800 interactions of the mathematical model with three different values of hemoglobin and the respective carbon dioxide transfer (**Panel B**). PaCO<sub>2</sub> - partial pressure of carbon dioxide.

*Other controlled variables were:*

Q<sub>CO</sub> = 8 L/minute

VCO<sub>2</sub> = 180mL/minute

pH = 7.40

Temperature = 37°C

Q<sub>ECMO</sub> = 3500 mL/minute

Sweep gas flow = 3.5L/minute

Q<sub>Pshunt</sub> = 95%

EtCO<sub>2</sub> = 2mmHg

V<sub>t</sub> = 10mL

RR = 10 BPM

Oxygen delivery, carbon dioxide removal, energy transfer to lungs and pulmonary hypertension behavior during venous-venous extracorporeal membrane oxygenation support

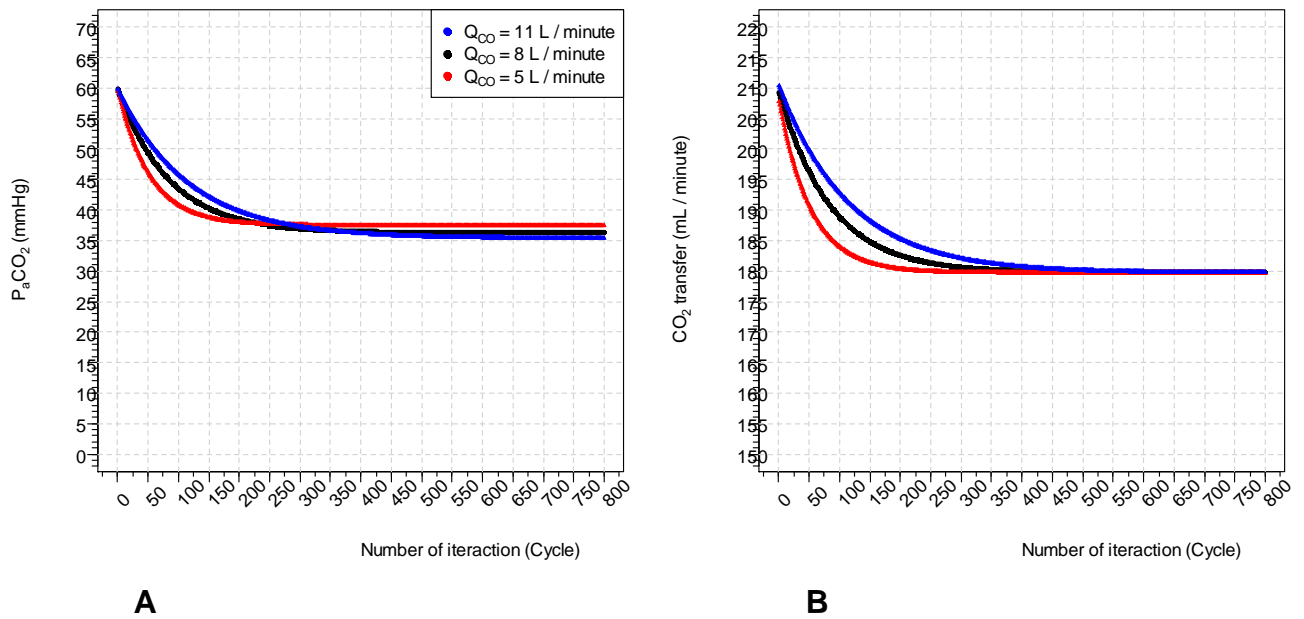

**Figure 17S** - Partial pressure of carbon dioxide (**Panel A**) after 800 iterations of the mathematical model with three different values of cardiac output and the respective carbon dioxide transfer (**Panel B**). P<sub>a</sub>CO<sub>2</sub> - partial pressure of carbon dioxide; Q<sub>CO</sub> - cardiac output.

*Other controlled variables were:*

Hb = 10g/dL

VCO<sub>2</sub> = 180mL/minute

pH = 7.40

Temperature = 37<sup>o</sup> C

Q<sub>ECMO</sub> = 3500mL/minute

Sweep gas flow = 3.5L/minute

Q<sub>Pshunt</sub> = 95%

EtCO<sub>2</sub> = 2mmHg

Vt = 10mL

RR = 10 BPM



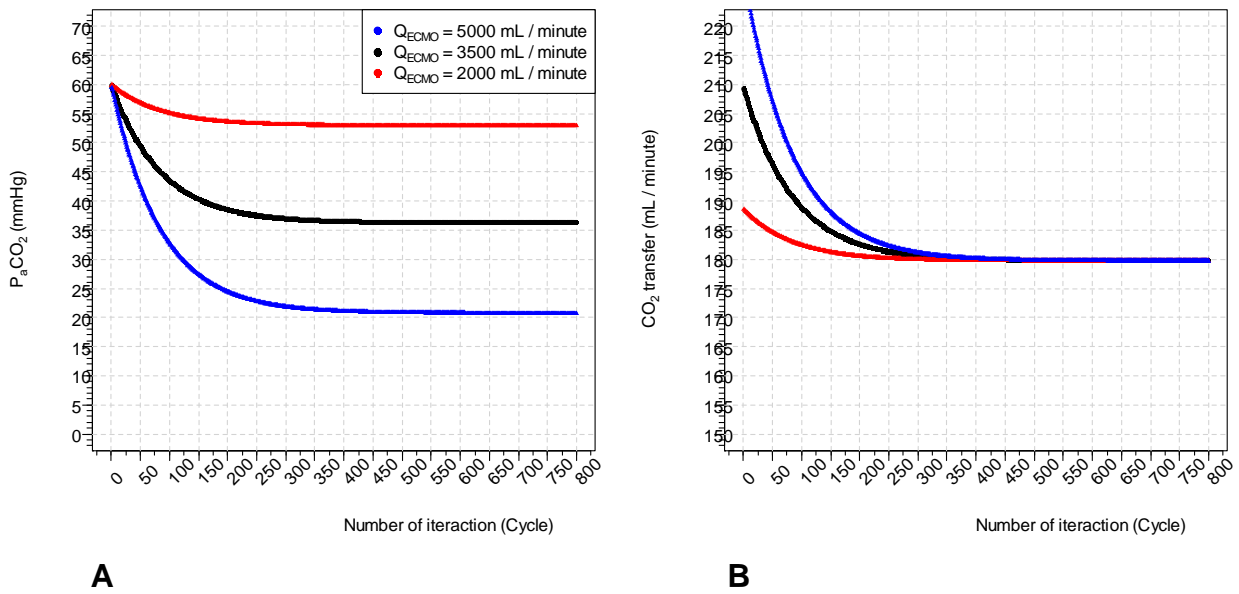

**Figure 18S** - Partial pressure of carbon dioxide (**Panel A**) after 800 iterations of the mathematical model with three different values of extracorporeal membrane oxygenation blood flow and the respective carbon dioxide transfer (**Panel B**).  $P_aCO_2$  - partial pressure of carbon dioxide;  $Q_{ECMO}$  - extracorporeal membrane oxygenation blood flow.

*Other controlled variables were:*

Hb = 10g/dL

$VCO_2$  = 180mL/minute

pH = 7.40

Temperature = 37°C

$Q_{CO}$  = 8 L/minute

Sweep gas flow = 3.5L/minute

$Q_{Pshunt}$  = 95%

$EtCO_2$  = 2mmHg

$V_t$  = 10mL

RR = 10 BPM

Oxygen delivery, carbon dioxide removal, energy transfer to lungs and pulmonary hypertension behavior during venous-venous extracorporeal membrane oxygenation support

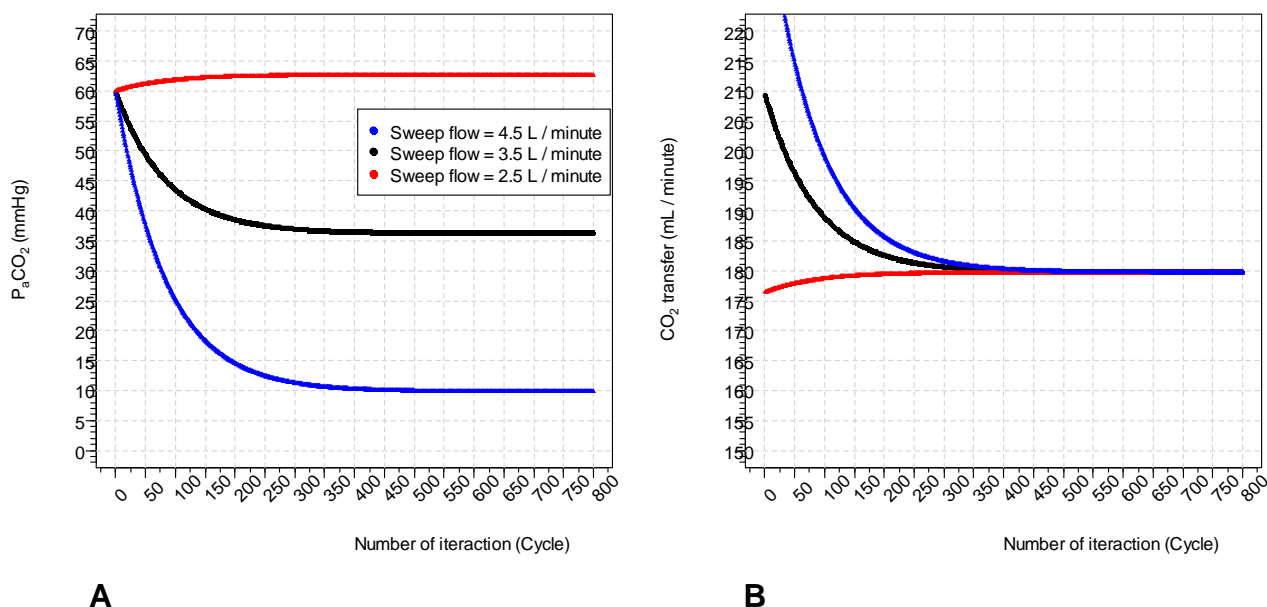

**Figure 19S** - Partial pressure of carbon dioxide (**Panel A**) after 800 iterations of the mathematical model with three different values of sweep flow and the respective carbon dioxide transfer (**Panel B**).  $P_aCO_2$  - partial pressure of carbon dioxide.

*Other controlled variables were:*

Hb = 10g/dL

$VCO_2$  = 180mL/minute

pH = 7.40

Temperature = 37° C

$Q_{CO}$  = 8L/minute

$Q_{ECMO}$  = 3500mL/minute

$Q_{Pshunt}$  = 95%

$EtCO_2$  = 2mmHg

$V_t$  = 10mL

RR = 10 BPM

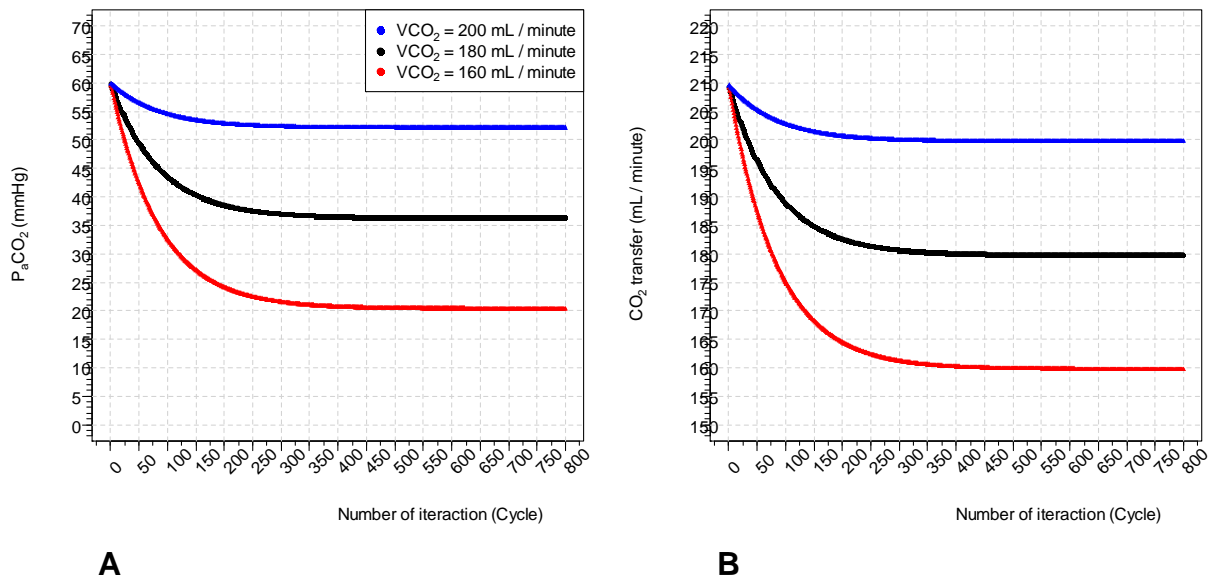

**Figure 20S** - Partial pressure of carbon dioxide (**Panel A**) after 800 iterations of the mathematical model with three different values of  $VCO_2$  and the respective carbon dioxide transfer (**Panel B**).  $P_aCO_2$  - partial pressure of carbon dioxide;  $VCO_2$  - carbon dioxide production.

*Other controlled variables were:*

Hb = 10g/dL

Sweep gas flow = 3.5L/minute

pH = 7.40

Temperature = 37°C

$Q_{CO}$  = 8L/minute

$Q_{ECMO}$  = 3500mL/minute

$Q_{Pshunt}$  = 95%

$EtCO_2$  = 2mmHg

$V_t$  = 10mL

RR = 10 BPM

#### 1.4. Oxygen partial pressure responsible for pulmonary vasoconstriction inhibition ( $P_{\text{stimulusO}_2}$ ).

The pulmonary pressure during ARDS results from many factors, such as hypoxemia, hypercapnia, pH, cardiac output, and lung parenchyma collapse. The oxygen partial pressure responsible for modulation of pulmonary arterial pressure results from the alveolar ( $P_{\text{AO}_2}$ ) and venous oxygen partial pressure ( $P_{\text{VO}_2}$ ) as following:<sup>(19)</sup>

$$P_{\text{stimulusO}_2} = P_{\text{AO}_2}^{0.68} + P_{\text{VO}_2}^{0.32}$$

The  $Q_{\text{Pshunt}}$  was taken into account considering the  $P_{\text{AO}_2}$  in shunt regions as zero due to alveolar collapse or absence of fresh air. In this way, the final  $P_{\text{stimulusO}_2}$  was calculated as:

$$P_{\text{stimulusO}_2} = [(Q_{\text{Pshunt}} / Q_{\text{CO}}) * P_{\text{VO}_2}^{0.32}] + [(1 - (Q_{\text{Pshunt}} / Q_{\text{CO}})) * (P_{\text{AO}_2}^{0.68} + P_{\text{VO}_2}^{0.32})]$$

## 2. RESULTS

This section shows complementary analyses using the mathematical models.

### 2.1. Energy transfer from the ventilator to the lungs

The marginal effect of PEEP, driving pressure, RR, and I:E ratio on the mechanical power in ultraprotective ventilation are shown below. Other variables besides the variable of interest were kept as described in the clinical scenario in the methods section of the main manuscript.

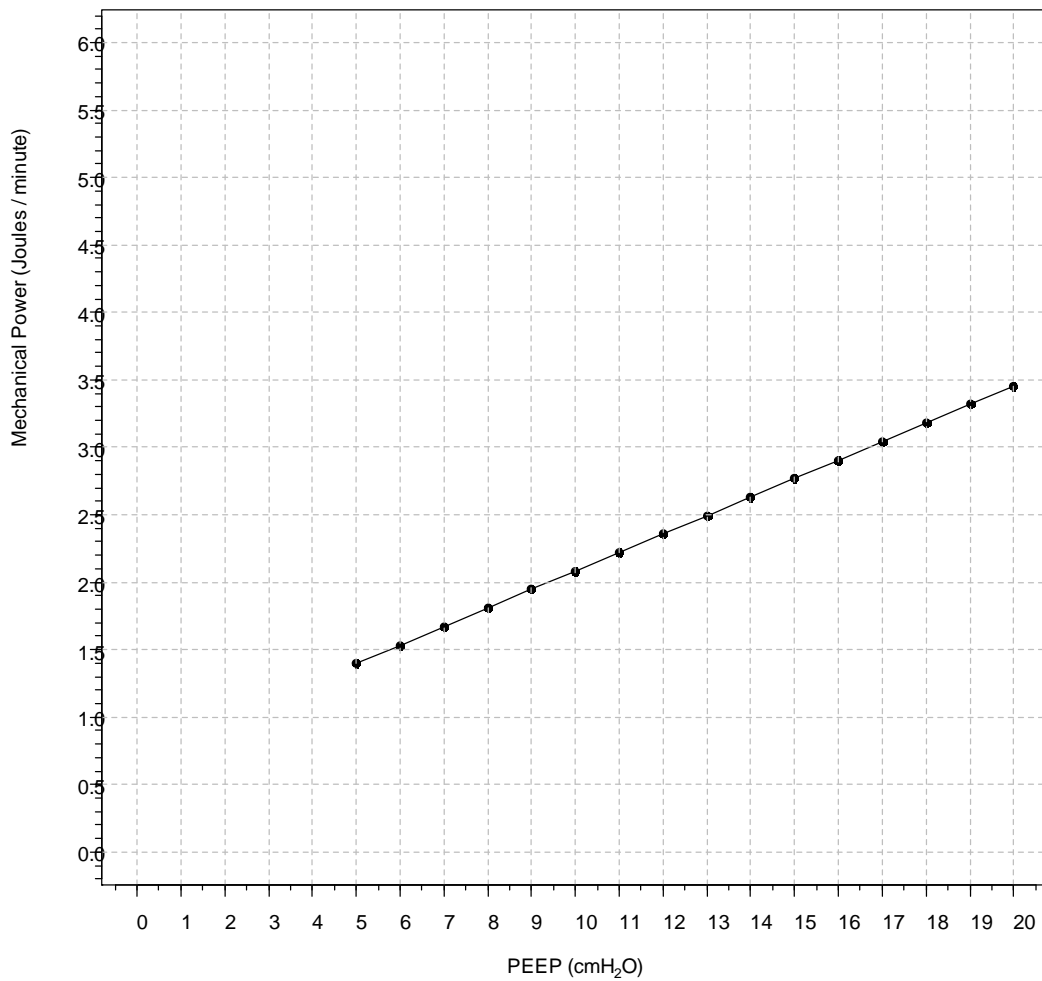

**Figure 21S** - Marginal effect of positive end-expiratory pressure on the mechanical power. The controlled variables were respiratory rate = 10 BPM, I:E = 1:2, driving pressure = 10cmH<sub>2</sub>O, and static respiratory compliance = 14mL/cmH<sub>2</sub>O. PEEP - positive end-expiratory pressure.

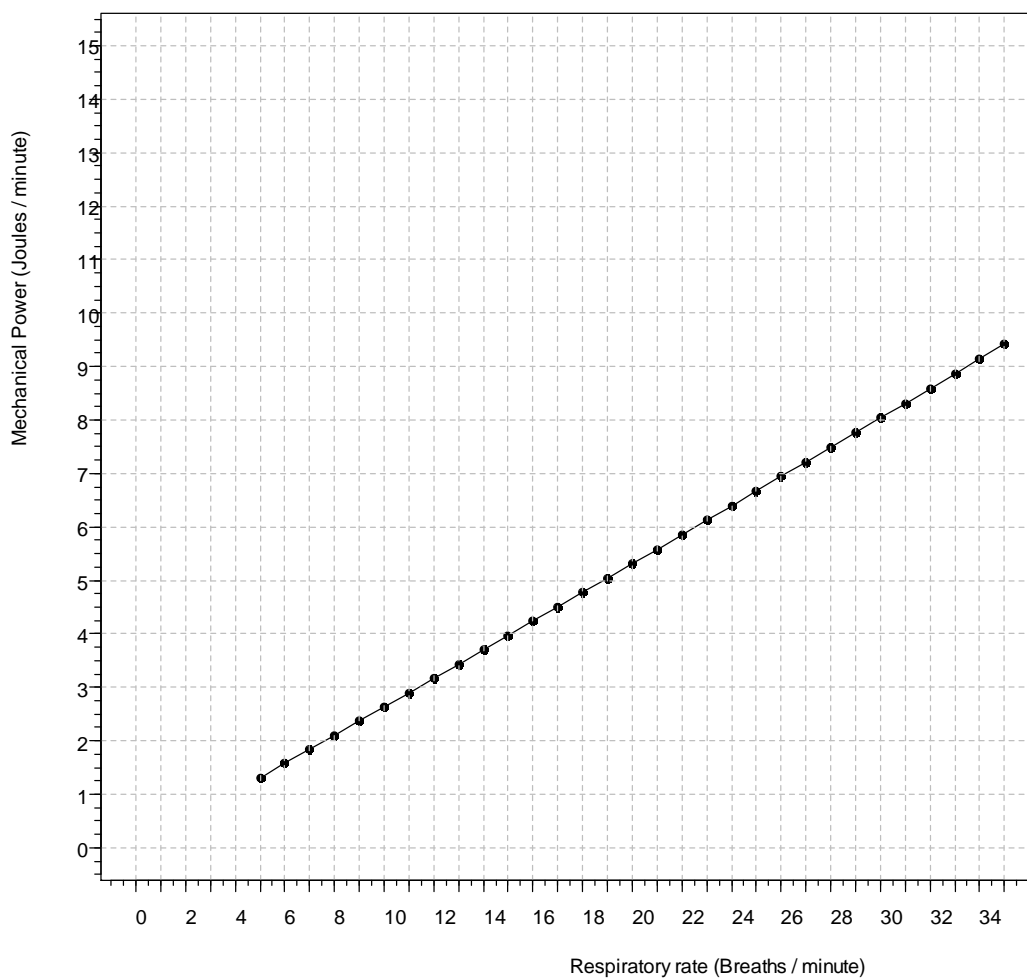

**Figure 22S** - Marginal effect of respiratory rate on the mechanical power. The controlled variables were positive end-expiratory pressure = 10cmH<sub>2</sub>O, I:E = 1:2, driving pressure = 10cmH<sub>2</sub>O, and static respiratory compliance = 14mL/cmH<sub>2</sub>O.

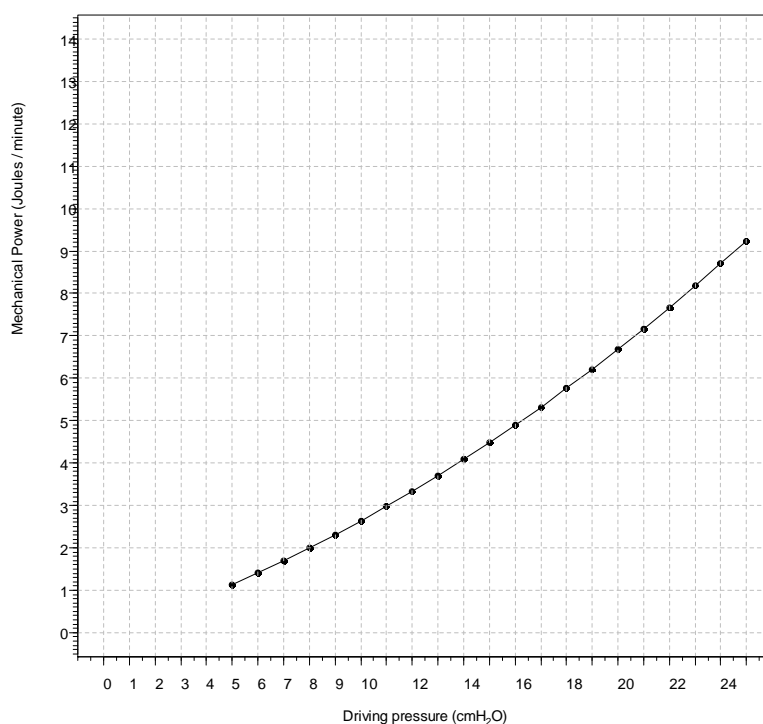

**Figure 23S** - Marginal effect of driving pressure on the mechanical power. The controlled variables were positive end-expiratory pressure = 10cmH<sub>2</sub>O, I:E = 1:2, respiratory rate = 10 BPM, and static respiratory compliance = 14mL/cmH<sub>2</sub>O.

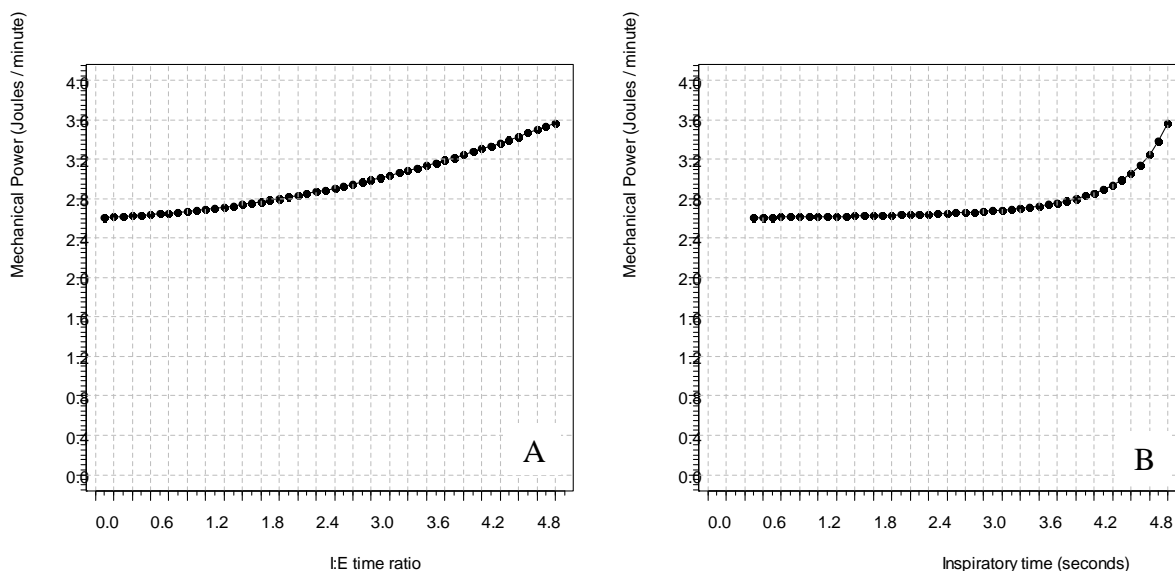

**Figure 24S** - Marginal effect of I:E ratio on the mechanical power. **Panel A** shows the association of I:E time ratio and mechanical power, and **Panel B** shows the association between inspiratory time in seconds with the mechanical power (with a fixed respiratory rate = 10 BPM). The controlled variables were positive end-expiratory pressure = 10cmH<sub>2</sub>O, driving pressure = 10cmH<sub>2</sub>O, respiratory rate = 10 BPM, and static respiratory compliance = 14mL/cmH<sub>2</sub>O.

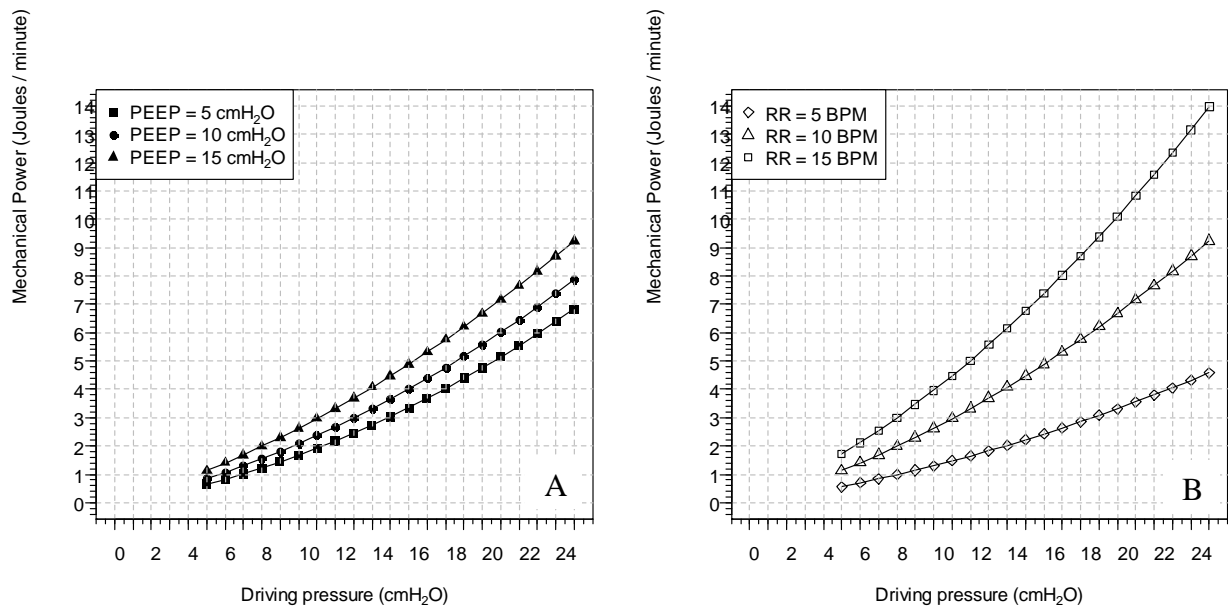

**Figure 25S** - Marginal effect of driving pressure on the mechanical power. **Panel A** shows the association between the plotted variables with different positive end-expiratory pressure levels (with a controlled respiratory rate = 10 BPM), and **Panel B** shows the association of plotted variables with different respiratory rates (with a controlled positive end-expiratory pressure = 10cmH<sub>2</sub>O). Static respiratory compliance was 14mL/cmH<sub>2</sub>O.



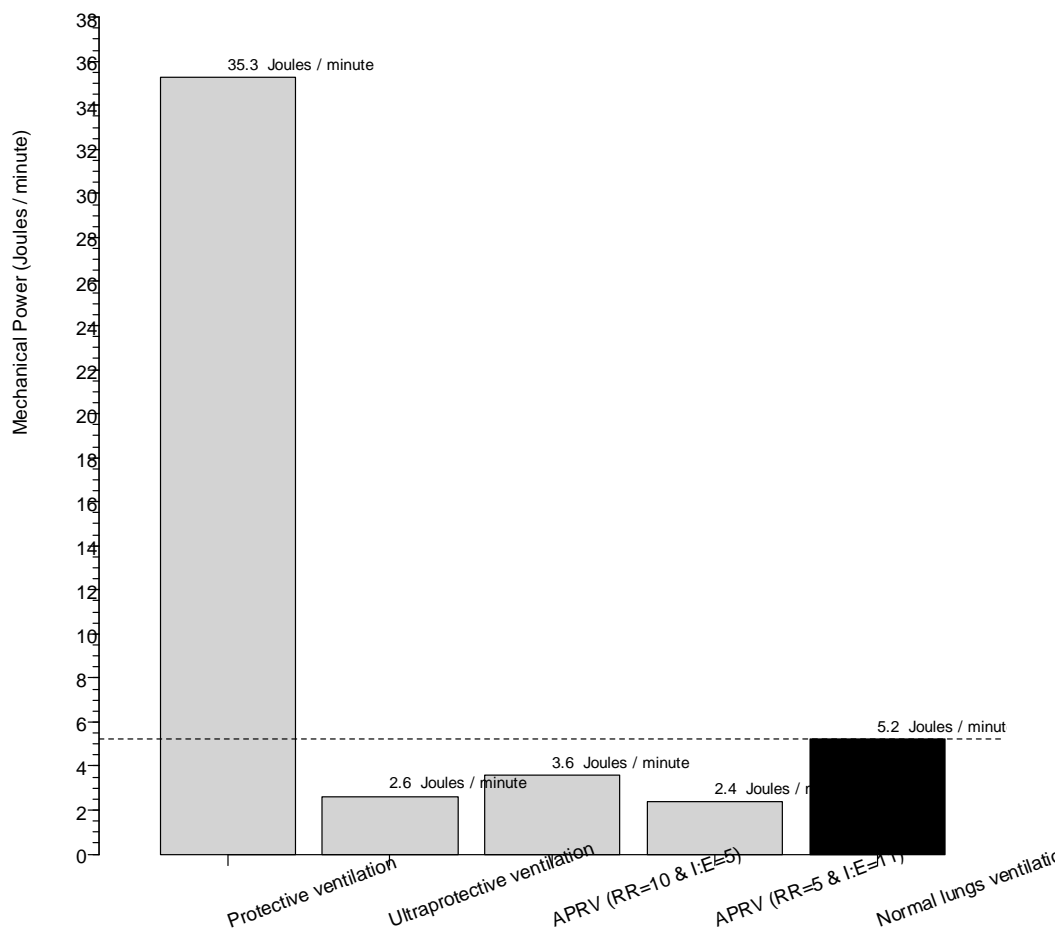

|                                               | Protective ventilation | Ultraprotective ventilation | APRV (RR = 10 & I:E = 5) | APRV (RR = 5 & I:E = 11) | Normal lung ventilation |
|-----------------------------------------------|------------------------|-----------------------------|--------------------------|--------------------------|-------------------------|
| Clinical scenario                             | ARDS                   | ARDS                        | ARDS                     | ARDS                     | General anesthesia      |
| C <sub>st</sub> (mL/cmH <sub>2</sub> O)       | 18                     | 14                          | 14                       | 14                       | 100                     |
| R <sub>aw</sub> (cmH <sub>2</sub> O/L/second) | 10                     | 10                          | 10                       | 10                       | 6                       |
| Tidal volume (mL)                             | 360                    | 14                          | 14                       | 14                       | 480                     |
| Respiratory rate (BPM)                        | 35                     | 10                          | 10                       | 5                        | 14                      |
| PEEP (cmH <sub>2</sub> O)                     | 18                     | 14                          | 14                       | 14                       | 5                       |
| I:E                                           | 1:2                    | 1:2                         | 5:1                      | 11:1                     | 1:2                     |

**Figure 26S** - Mechanical power expressing the energy load per minute transferred from the mechanical ventilator to the lungs. APRV - airway pressure release ventilation; RR - respiratory rate; I:E – I/E time ratio.

Clinical scenario of the ARDS patient is shown in the methods text of the main manuscript. Normal lungs ventilation expresses the mechanical power of a healthy patient under general anesthesia for an elective surgery.

## 2.2. Arterial oxygenation and total amount of oxygen transfer

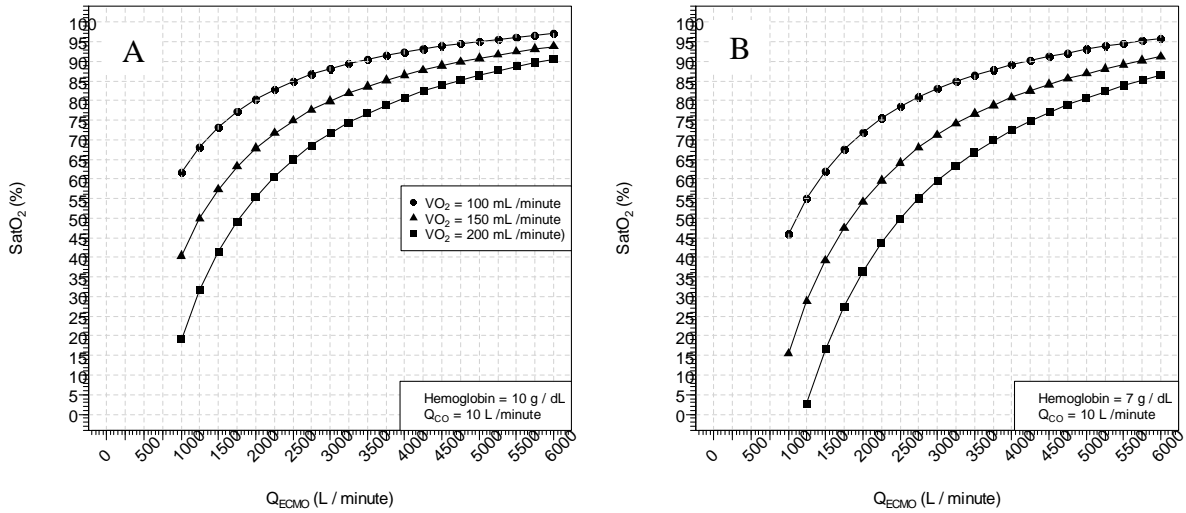

**Figure 27S** - Marginal effect of extracorporeal membrane oxygenation blood flow ON oxygen saturation at different  $VO_2$ , with a fixed pulmonary blood flow in shunt regions of 95%. **Panel A** shows the effect with hemoglobin of 10g/dL and a cardiac output of 10L/minute, and **Panel B** shows the effect with hemoglobin of 7g/dL and cardiac output of 10L/minute.  $SatO_2$  - oxygen saturation;  $VO_2$  - oxygen consumption;  $Q_{CO}$  - cardiac output;  $Q_{ECMO}$  - extracorporeal membrane oxygenation blood flow.

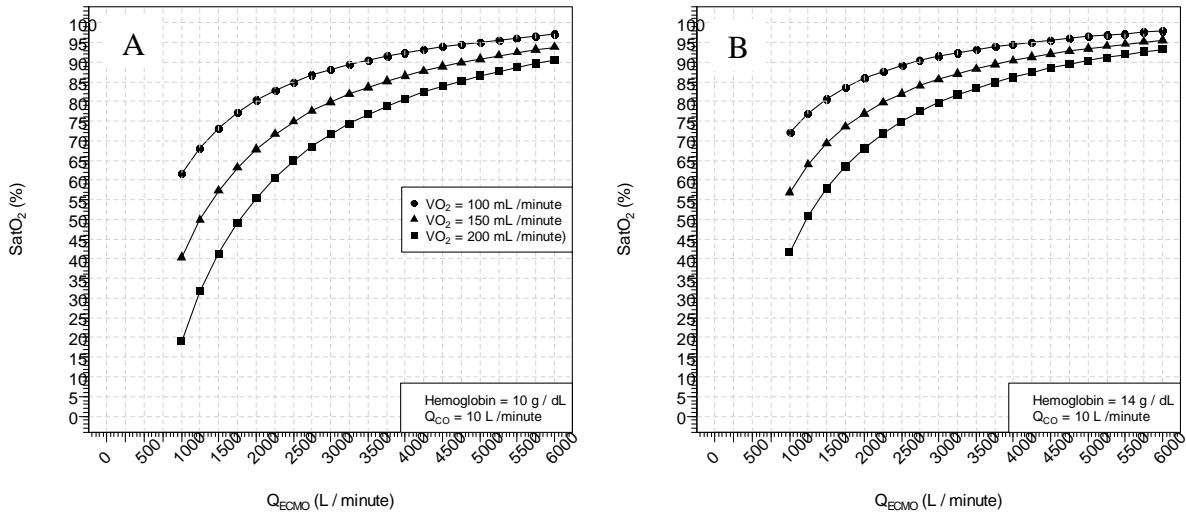

**Figure 28S** - Marginal effect of extracorporeal membrane oxygenation blood flow ON oxygen saturation at different  $VO_2$ , with a fixed pulmonary blood flow in shunt regions of 95%. **Panel A** shows the effect with hemoglobin of 10g/dL and a cardiac output of 10L/minute, and **Panel B** shows the effect with hemoglobin of 14g/dL and cardiac output of 10L/minute.  $SatO_2$  - oxygen saturation;  $VO_2$  - oxygen consumption;  $Q_{CO}$  - cardiac output;  $Q_{ECMO}$  - extracorporeal membrane oxygenation blood flow.

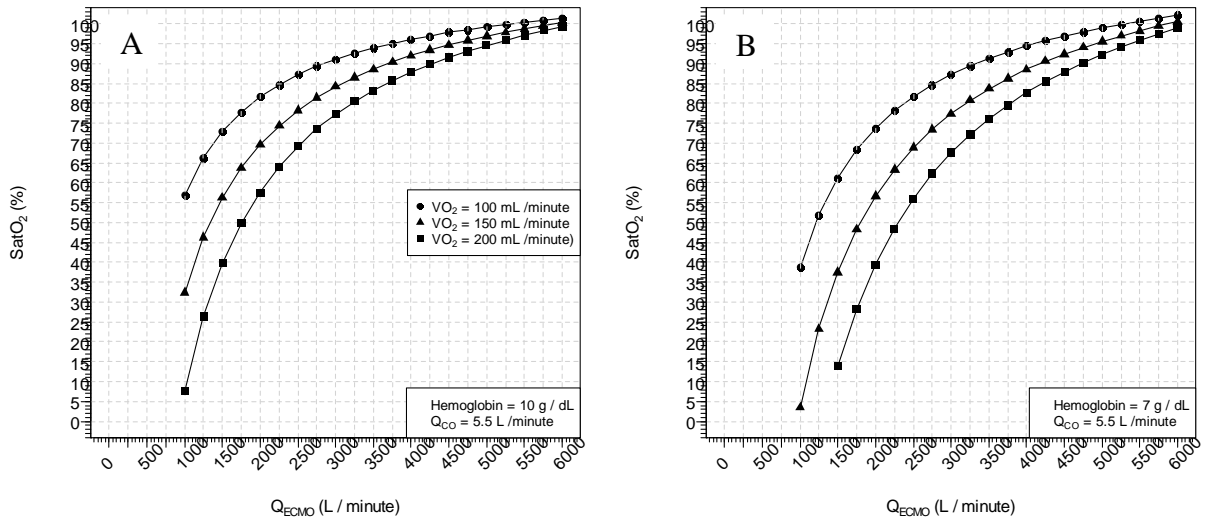

**Figure 29S** - Marginal effect of extracorporeal membrane oxygenation blood flow on oxygen saturation at different  $VO_2$ , with a fixed pulmonary blood flow in shunt regions of 95%. **Panel A** shows the effect with hemoglobin of 10g/dL and a cardiac output of 5.5L/minute, and **Panel B** shows the effect with hemoglobin of 7g/dL and cardiac output of 5.5L/minute. SatO<sub>2</sub> - oxygen saturation; VO<sub>2</sub> - oxygen consumption; Q<sub>CO</sub> - cardiac output; Q<sub>ECMO</sub> - extracorporeal membrane oxygenation blood flow.

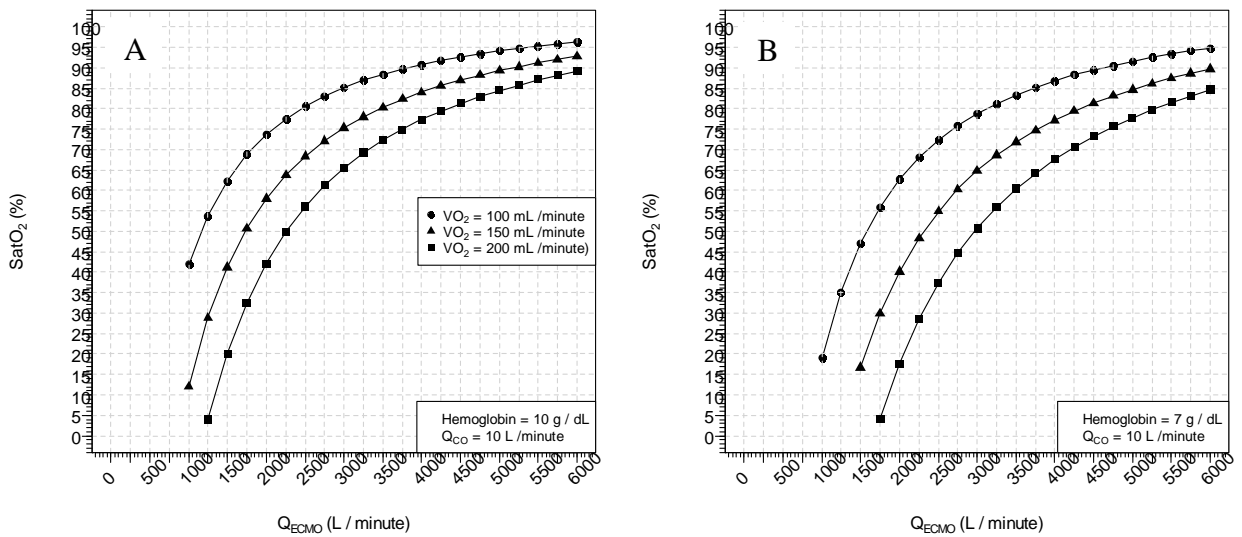

**Figure 30S** - Marginal effect of extracorporeal membrane oxygenation blood flow on oxygen saturation at different  $VO_2$ , with a fixed pulmonary blood flow in shunt regions of 100%. **Panel A** shows the effect with hemoglobin of 10g/dL and a cardiac output of 10L/minute, and **Panel B** shows the effect with hemoglobin of 7g/dL and cardiac output of 10L/minute. SatO<sub>2</sub> - oxygen saturation; VO<sub>2</sub> - oxygen consumption; Q<sub>CO</sub> - cardiac output; Q<sub>ECMO</sub> - extracorporeal membrane oxygenation blood flow.

### 2.3. Arterial carbon dioxide and total amount of carbon dioxide transfer

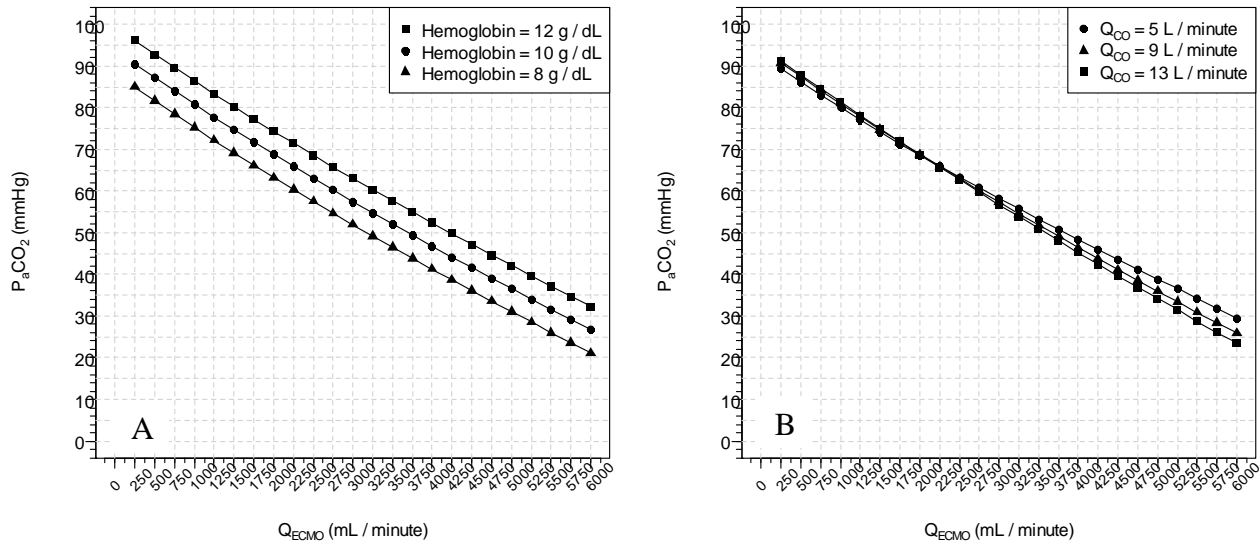

**Figure 31S** - Partial pressure of carbon dioxide behavior with progressive increments of extracorporeal membrane oxygenation blood flow with three different hemoglobin levels and a cardiac output = 8L/minute (**Panel A**), and three different cardiac output with fixed hemoglobin = 8g/dL (**Panel B**).  $P_aCO_2$  - partial pressure of carbon dioxide;  $Q_{ECMO}$  - extracorporeal membrane oxygenation blood flow;  $Q_{CO}$  - cardiac output.

*Other controlled variables were:*

$VCO_2$  = 200mL/minute

pH = 7.40

Temperature = 37°C

$Q_{CO}$  = 8L/minute

$Q_{Pshunt}$  = 95%

$EtCO_2$  = 2mmHg

$V_t$  = 10mL

RR = 10 BPM

## 2.4. Oxygen partial pressure responsible for pulmonary vasoconstriction inhibition ( $P_{\text{stimulusO}_2}$ )

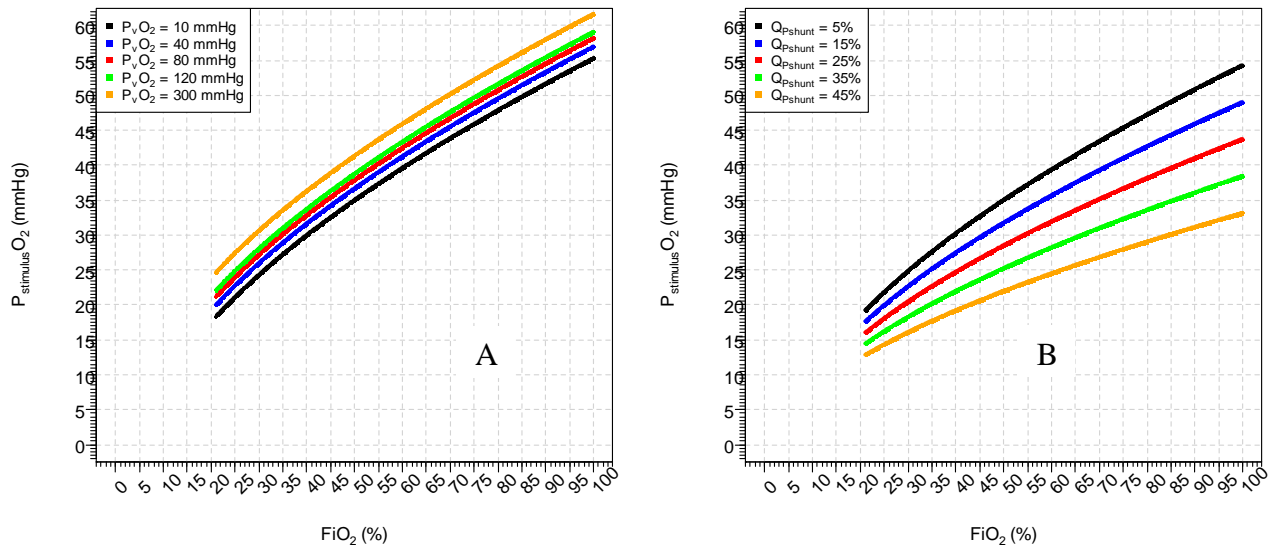

**Figure 32S** -  $P_{\text{stimulusO}_2}$  behavior with progressive increments of fraction of inspired oxygen with different  $P_{vO_2}$  levels (**Panel A**), and  $P_{\text{stimulusO}_2}$  behavior with progressive increments of fraction of inspired oxygen with different  $Q_{Pshunt}$  levels (**Panel B**).  $P_{\text{stimulusO}_2}$  - oxygen partial pressure responsible for hypoxic vasoconstriction;  $FiO_2$  - fraction of inspired oxygen;  $P_{vO_2}$  - mixed venous oxygen partial pressure;  $Q_{Pshunt}$  - shunt fraction.

### 3. REFERENCES

1. Chiumello D, Carlesso E, Cadringer P, Caironi P, Valenza F, Polli F, et al. Lung stress and strain during mechanical ventilation for acute respiratory distress syndrome. *Am J Respir Crit Care Med.* 2008;178(4):346-55.
2. Protti A, Votta E, Gattinoni L. Which is the most important strain in the pathogenesis of ventilator-induced lung injury: dynamic or static? *Curr Opin Crit Care.* 2014;20(1):33-8.
3. Protti A, Andreis DT, Monti M, Santini A, Sparacino CC, Langer T, et al. Lung stress and strain during mechanical ventilation: any difference between statics and dynamics? *Crit Care Med.* 2013;41(4):1046-55.
4. Gattinoni L, Tonetti T, Cressoni M, Cadringer P, Herrmann P, Moerer O, et al. Ventilator-related causes of lung injury: the mechanical power. *Intensive Care Med.* 2016;42(10):1567-75.
5. Otis AB, Fenn WO, Rahn H. Mechanics of breathing in man. *J Appl Physiol.* 1950;2(11):592-607.
6. Marhong JD, Telesnicki T, Munshi L, Del Sorbo L, Detsky M, Fan E. Mechanical ventilation during extracorporeal membrane oxygenation. An international survey. *Ann Am Thorac Soc.* 2014;11(6):956-61.
7. Peek GJ, Mugford M, Tiruvoipati R, Wilson A, Allen E, Thalanany MM, Hibbert CL, Truesdale A, Clemens F, Cooper N, Firmin RK, Elbourne D; CESAR trial collaboration. Efficacy and economic assessment of conventional ventilatory support versus extracorporeal membrane oxygenation for severe adult respiratory failure (CESAR): a multicentre randomised controlled trial. *Lancet.* 2009;374(9698):1351-63. Erratum in *Lancet.* 2009;374(9698):1330.
8. Schmidt M, Stewart C, Bailey M, Nieszkowska A, Kelly J, Murphy L, et al. Mechanical ventilation management during extracorporeal membrane oxygenation for acute respiratory distress syndrome: a retrospective international multicenter study. *Crit Care Med.* 2015;43(3):654-64.
9. Schmidt M, Pellegrino V, Combes A, Scheinkestel C, Cooper DJ, Hodgson C. Mechanical ventilation during extracorporeal membrane oxygenation. *Crit Care.* 2014;18(1):203.
10. Park M, Azevedo LC, Mendes PV, Carvalho CR, Amato MB, Schettino GP, et al. First-year experience of a Brazilian tertiary medical center in supporting severely ill patients using extracorporeal membrane oxygenation. *Clinics (Sao*

Paulo). 2012;67(10):1157-63.

11. Serpa Neto A, Schmidt M, Azevedo LC, Bein T, Brochard L, Beutel G, Combes A, Costa EL, Hodgson C, Lindskov C, Lubnow M, Lueck C, Michaels AJ, Paiva JA, Park M, Pesenti A, Pham T, Quintel M, Marco Ranieri V, Ried M, Roncon-Albuquerque R Jr, Slutsky AS, Takeda S, Terragni PP, Vejen M, Weber-Carstens S, Welte T, Gama de Abreu M, Pelosi P, Schultz MJ; ReVA Research Network and the PROVE Network Investigators. Associations between ventilator settings during extracorporeal membrane oxygenation for refractory hypoxemia and outcome in patients with acute respiratory distress syndrome: a pooled individual patient data analysis: mechanical ventilation during ECMO. *Intensive Care Med.* 2016;42(11):1672-84.

12. Broman M, Frenckner B, Bjällmark A, Broomé M. Recirculation during venovenous extra-corporeal membrane oxygenation--a simulation study. *Int J Artif Organs.* 2015;38(1):23-30.

13. Abrams D, Bacchetta M, Brodie D. Recirculation in venovenous extracorporeal membrane oxygenation. *ASAIO J.* 2015;61(2):115-21.

14. Sreenan C, Osiovich H, Cheung PY, Lemke RP. Quantification of recirculation by thermodilution during venovenous extracorporeal membrane oxygenation. *J Pediatr Surg.* 2000;35(10):1411-4.

15. Park M, Costa EL, Maciel AT, Silva DP, Friedrich N, Barbosa EV, et al. Determinants of oxygen and carbon dioxide transfer during extracorporeal membrane oxygenation in an experimental model of multiple organ dysfunction syndrome. *PLoS One.* 2013;8(1):e54954.

16. Nunes LB, Mendes PV, Hirota AS, Barbosa EV, Maciel AT, Schettino GP, Costa EL, Azevedo LC, Park M; ECMO Group. Severe hypoxemia during venovenous extracorporeal membrane oxygenation: exploring the limits of extracorporeal respiratory support. *Clinics (Sao Paulo).* 2014;69(3):173-8.

17. Douglas AR, Jones NL, Reed JW. Calculation of whole blood CO<sub>2</sub> content. *J Appl Physiol (1985).* 1988;65(1):473-7.

18. Mallat J, Mohammad U, Lemyze M, Meddour M, Jonard M, Pepy F, et al. Acute hyperventilation increases the central venous-to-arterial PCO<sub>2</sub> difference in stable septic shock patients. *Ann Intensive Care.* 2017;7(1):31.

19. Lumb AB, Slinger P. Hypoxic pulmonary vasoconstriction: physiology and anesthetic implications. *Anesthesiology.* 2015;122(4):932-46.

## 4. APENDIX

The following scripts were written in C language in R free source software.

### 4.1. Script for SatO<sub>2</sub> looping

```
require(Hmisc)

# Variables
VO2 <- 200
Hb <- 10
CO <- 5
PaCO2 <- 40
FiO2v <- 30
BF <- 3500
Pshunt <- 90
SpO2 <- 64

# Looping preparation
SatO2 <- SpO2
SatO2 <- as.vector(SatO2)
o2t1 <- 0

#### Recirculation term
BF <- BF - (0.291321*(1-0.2791^(BF/(1000*CO))) * BF)

# 20 Iteractions
for (i in 1:20){

#### Peripheral compartment
  SinO2 <- SpO2/100 - (VO2/(CO*10*Hb*1.36))
  Cin <- SinO2*1.36*Hb

#### ECMO oxygenation
  PO2post <- 130.5 + 319.5 * exp(1) ^ (-0.0005 * BF)
  Cpost <- 0.0031*PO2post + Hb*1.36

#### Venous admixture
  Cva <- ((Cpost * BF) + (Cin * (CO*1000-BF)))/(CO*1000)

#### Pulmonary residual oxygenation
  PAO2 <- 653*(FiO2v/100) - (PaCO2/0.8)
  CcO2 <- 0.0031 * PAO2 + 1.36 * Hb
  CaO2 <- ((Pshunt/100) * Cva + (1-(Pshunt/100)) * CcO2)
  SatO2[i] <- SpO2
  SpO2 <- 100*CaO2/(1.36*Hb)

#### O2 transfer
  o2t1[i] <- (Cpost-Cin)*BF/100
}

## Plot
windows(20,20)
par(mfrow=c(2,2))
plot(1:i,SatO2,xlim=c(0,20),ylim=c(0,100),axes=T,at=-1000,
```



```
xlab="Number of iteration (Cycle)",
ylab=expression(paste("SatO"[2], "%")),
pch=19,type="o",cex=1)
axis(1,at=seq(0,i,1),labels=F)
axis(2,at=seq(0,100,10),las=2)
minor.tick(10,20,0.5)
text(seq(0,i,1), par("usr")[3]-5,
      labels = seq(0,i,1),
      srt = 45,
      xpd = TRUE, cex=1)
abline(v=seq(0,i,1),col="lightgray",lty=2)
abline(h=seq(0,100,10),col="lightgray",lty=2)
```

## 4.2. Script for PaCO<sub>2</sub> looping

```
library(Hmisc)

#### Variables
co <- 8
vco2 <- 180
hb <- 10
ph <- 7.40
temp <- 37
BF <- 3500
sweep <- 3.5

Pshunt <- 95
etco2 <- 2
vt <- 10
RR <- 10

co2 <- 62
co2 <- as.vector(co2)

## first loop
for (l in 1:24){
  BF <- 250 * l

# Recirculation term and constants
BF <- BF - (0.291321*(1-0.2791^(BF/(1000*co))) * BF)
cco2ad <- vco2/(co*10)
pk <- 6.086+(0.042*(7.4-ph))+((38-temp)*0.00472+(0.00139*(7.4-ph)))
s <- 0.0307+(0.00057*(37-temp))+(0.00002*(37-temp)^2)
sato2 <- 64
co2a <- 62

## Loop start
for (i in 1:800){

# cco2v calculus
plasmaco2 <- 2.226*s*co2a*(1+10^(ph-pk))
cco2a <- (1-((0.0289*hb)/(3.352-0.456*(sato2/100)*(8.142-ph))))*plasmaco2
cco2v <- cco2a + cco2ad
plasmaco2v <- cco2v/((1-((0.0289*hb)/(3.352-0.456*(sato2/100)*(8.122-ph))))))
co2v <- plasmaco2v/(2.226*s*(1+10^(ph-pk-0.02)))
```

Oxygen delivery, carbon dioxide removal, energy transfer to lungs and pulmonary hypertension behavior during venous-venous extracorporeal membrane oxygenation support

```
# ECMO co2 transfer
co2t <- (BF*0.017)+(sweep*32.91)+(co2v*1.192)-(hb*3.478)
ecmocco2ret <- (BF * cco2v / 100) - co2t
ccpostco2 <- ecmocco2ret*100/BF
# Venous admixture
cco2va <- (BF/(co*1000)*ccpostco2) + (((co*1000)-BF)/(co*1000)*cco2v)

# Lung ventilation & decarboxilation
mvco2 <- RR*vt*etco2/690
Pshunt <- Pshunt+0.1
cdcco2 <- (cco2va*(co*1000*(1-(Pshunt/100)))/100)-mvco2
cco2plung <- cdcco2*100/(co*1000*(1-(Pshunt/100)))
cco2a <- cco2va*(Pshunt/100) + cco2plung*(1-(Pshunt/100))

## CO2a calculus & Loop end
plasmaco2a <- cco2a/((1-((0.0289*hb)/(3.352-0.456*(sato2/100)*(8.142-ph))))))
co2a <- plasmaco2a/(2.226*s*(1+10^(ph-pk)))
}
co2[l] <- co2a
}

## Plot
windows(20,10)
par(mfrow=c(1,2))
plot(-10,-10,xlim=c(0,24),ylim=c(0,100),axes=T,at=-1000,
      xlab=expression(paste("Q"[ECMO]," (mL / minute)")),
      ylab=expression(paste("P"[a],"CO"[2]," (mmHg)")),
      pch=19,type="o",cex=0.5)
axis(1,at=seq(0,l,1),labels=F)
axis(2,at=seq(0,100,10),las=2)
minor.tick(10,10,0.5)
text(seq(0,l,1)-0.2, par("usr")[3]-7,
      labels = seq(0,6000,250),
      srt = 45,
      xpd = TRUE, cex=0.8)
abline(v=seq(0,l,1),col="lightgray",lty=2)
abline(h=seq(0,100,5),col="lightgray",lty=2)
points(1:l,co2,pch=19,type="o",cex=1)
```
